# Supplementary material for: New spirobisnaphthalenes from an endolichenic fungus strain CGMCC 3.15192 and their anticancer effects through the P53–P21 pathway
Source: Royal Society of Chemistry journal article supplement (doi:10.1039/c9ra07917c), 2019-01-01
Supplement: c9ra07917c1.pdf [file c9ra07917c1.pdf]

## Supplementary data

### **New spirobisanaphthalenes from an endolichenic fungus strain CGMCC 3.15192**

#### **and their anticancer effects through the P53-P21 pathway**

Jingwen Li <sup>a†</sup>, Rong Ding <sup>b†</sup>, Hao Gao <sup>a</sup>, Liangdong Guo <sup>c</sup>, Xinsheng Yao <sup>a</sup>, Youwei

Zhang <sup>d,\*</sup>, Jinshan Tang <sup>a\*</sup>

a Institute of Traditional Chinese Medicine and Natural Products, International Cooperative Laboratory of Traditional Chinese Medicine Modernization and Innovative Drug Development of Chinese Ministry of Education (MOE), College of Pharmacy, Jinan University, Guangzhou 510632, People's Republic of China

b School of Pharmaceutical Sciences, Xiamen University, Xiamen 361005, People's Republic of China

c State Key Laboratory of Mycology, Institute of Microbiology, Chinese Academy of Sciences, Beijing 100101, P. R. China

d Department of Pharmacology, Case Comprehensive Cancer Center, Case Western Reserve University School of Medicine, Cleveland, OH 44106, USA

\*Corresponding authors:

Youwei Zhang, 2109 Adelbert Road, Cleveland, OH 44106, USA. E-mail: [yxz169@case.edu](mailto:yxz169@case.edu);

Jinshan Tang, W601 Huangpu Ave., Guangzhou, Guangdong 510632, China. Email: [gztangjinshan@126.com](mailto:gztangjinshan@126.com)

<sup>†</sup> Equally to this work.

## Contents

|                                                                              |                                                                                                                                   |
|------------------------------------------------------------------------------|-----------------------------------------------------------------------------------------------------------------------------------|
| S. 1 $^1\text{H}$ -NMR spectrum of the new compound <b>1</b>                 | 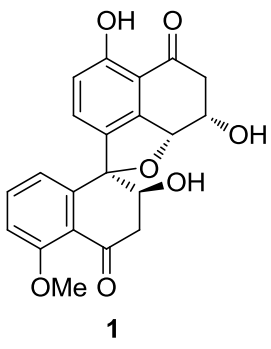 <p style="text-align: center;"><b>1</b></p>   |
| S. 2 $^{13}\text{C}$ -NMR & DEPT-135 spectrum of the new compound <b>1</b>   |                                                                                                                                   |
| S. 3 $^1\text{H}$ - $^1\text{H}$ COSY spectrum of the new compound <b>1</b>  |                                                                                                                                   |
| S. 4 HSQC spectrum of the new compound <b>1</b>                              |                                                                                                                                   |
| S. 5 HMBC spectrum of the new compound <b>1</b>                              |                                                                                                                                   |
| S. 6-1 1D sel. Gr. NOE spectrum of the new compound <b>1</b>                 |                                                                                                                                   |
| S. 6-2 1D sel. Gr. NOE spectrum of the new compound <b>1</b>                 |                                                                                                                                   |
| S. 7 HRESIMS spectrum of the new compound <b>1</b>                           |                                                                                                                                   |
| S. 8 IR spectrum of the new compound <b>1</b>                                |                                                                                                                                   |
| S. 9 CD spectrum of the compounds <b>1</b> and <b>2</b>                      |                                                                                                                                   |
| S. 10 $^1\text{H}$ -NMR spectrum of the new compound <b>2</b>                |  <p style="text-align: center;"><b>2</b></p>  |
| S. 11 $^{13}\text{C}$ -NMR & DEPT-135 spectrum of the new compound <b>2</b>  |                                                                                                                                   |
| S. 12 $^1\text{H}$ - $^1\text{H}$ COSY spectrum of the new compound <b>2</b> |                                                                                                                                   |
| S. 13 HSQC spectrum of the new compound <b>2</b>                             |                                                                                                                                   |
| S. 14 HMBC spectrum of the new compound <b>2</b>                             |                                                                                                                                   |
| S. 15 ROESY spectrum of the new compound <b>2</b>                            |                                                                                                                                   |
| S. 16 HRESIMS spectrum of the new compound <b>2</b>                          |                                                                                                                                   |
| S. 17 IR spectrum of the new compound <b>2</b>                               |                                                                                                                                   |
| S. 18 $^1\text{H}$ -NMR spectrum of the new compound <b>3</b>                |  <p style="text-align: center;"><b>3</b></p> |
| S. 19 $^{13}\text{C}$ -NMR & DEPT-135 spectrum of the new compound <b>3</b>  |                                                                                                                                   |
| S. 20 $^1\text{H}$ - $^1\text{H}$ COSY spectrum of the new compound <b>3</b> |                                                                                                                                   |
| S. 21 HSQC spectrum of the new compound <b>3</b>                             |                                                                                                                                   |
| S. 22 HMBC spectrum of the new compound <b>3</b>                             |                                                                                                                                   |
| S. 23-1 1D sel. Gr. NOE spectrum of the new compound <b>3</b>                |                                                                                                                                   |
| S. 23-2 1D sel. Gr. NOE spectrum of the new compound <b>3</b>                |                                                                                                                                   |
| S. 24 HRESIMS spectrum of the new compound <b>3</b>                          |                                                                                                                                   |
| S. 25 IR spectrum of the new compound <b>3</b>                               |                                                                                                                                   |
| S. 26 CD spectrum of the compound <b>3</b>                                   |                                                                                                                                   |

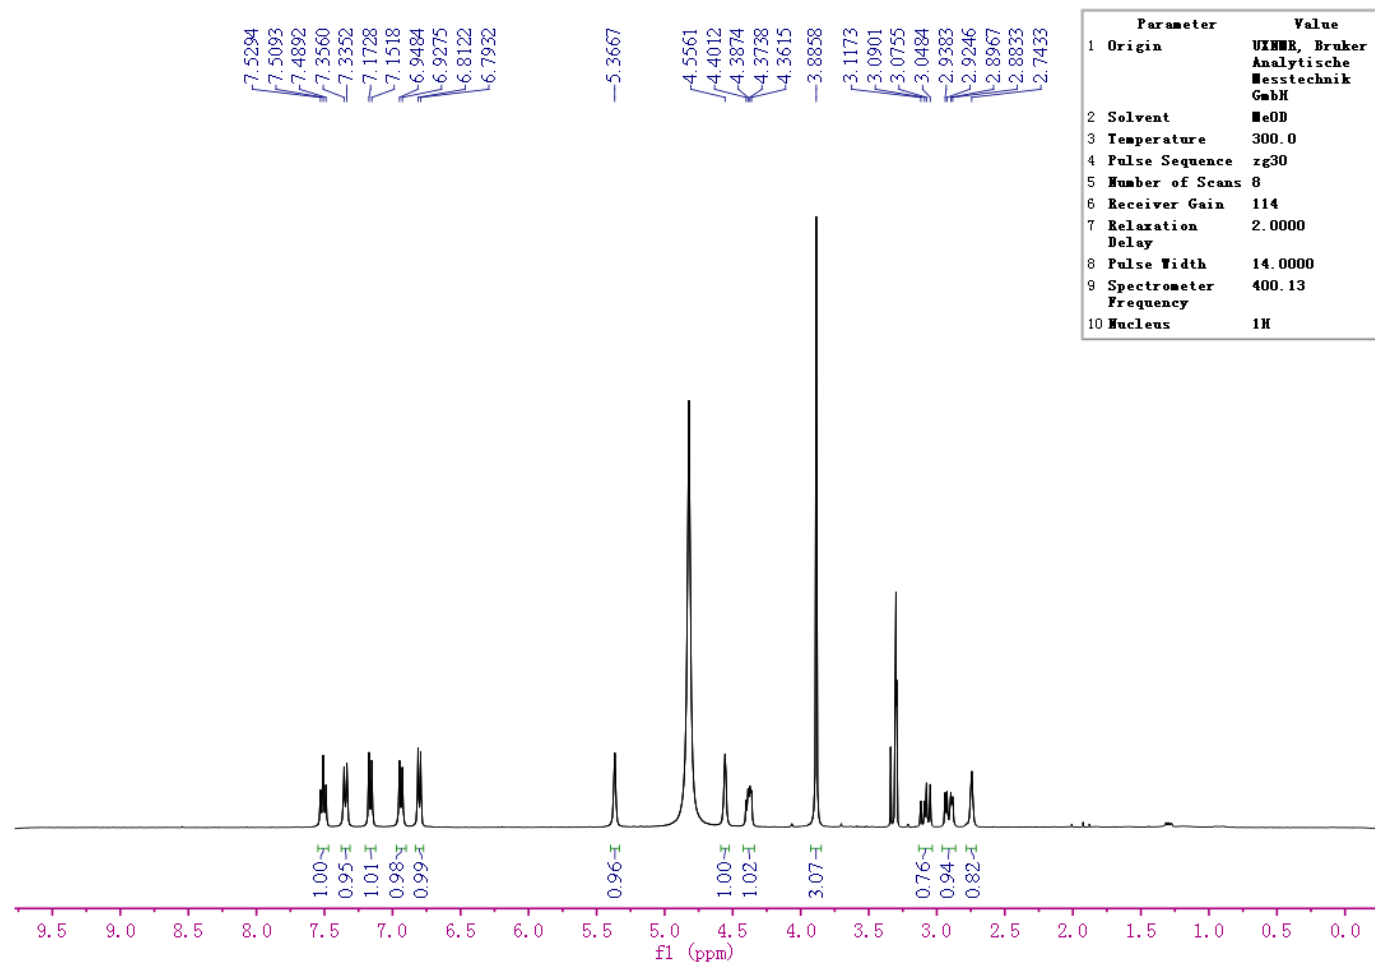

Fig. S1 <sup>1</sup>H-NMR spectrum of the new compound **1**

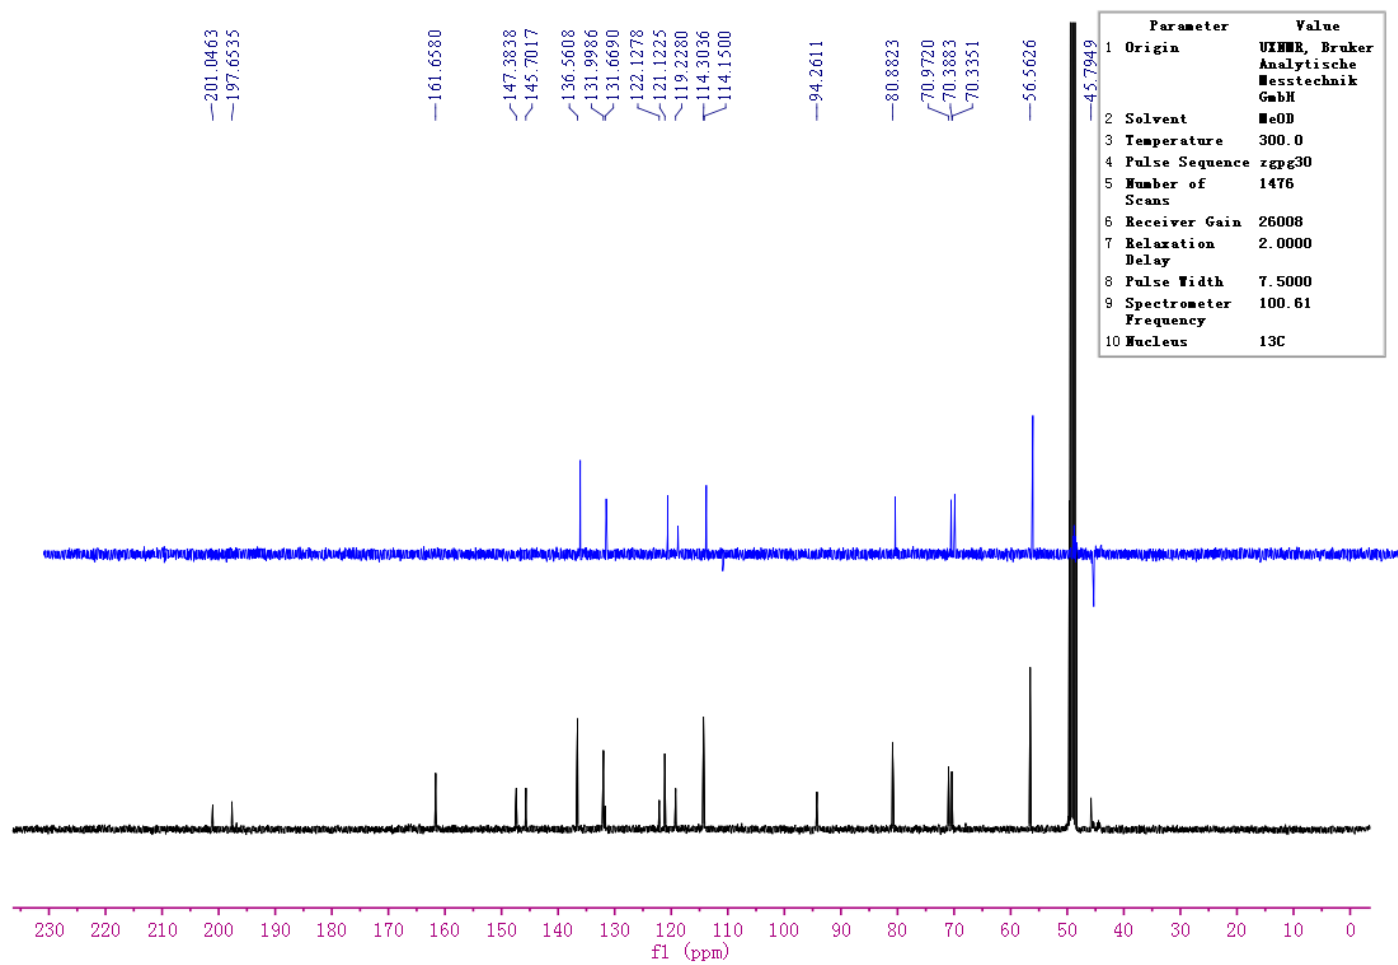

Fig. S2  $^{13}\text{C}$ -NMR & DEPT-135 spectrum of the new compound **1**

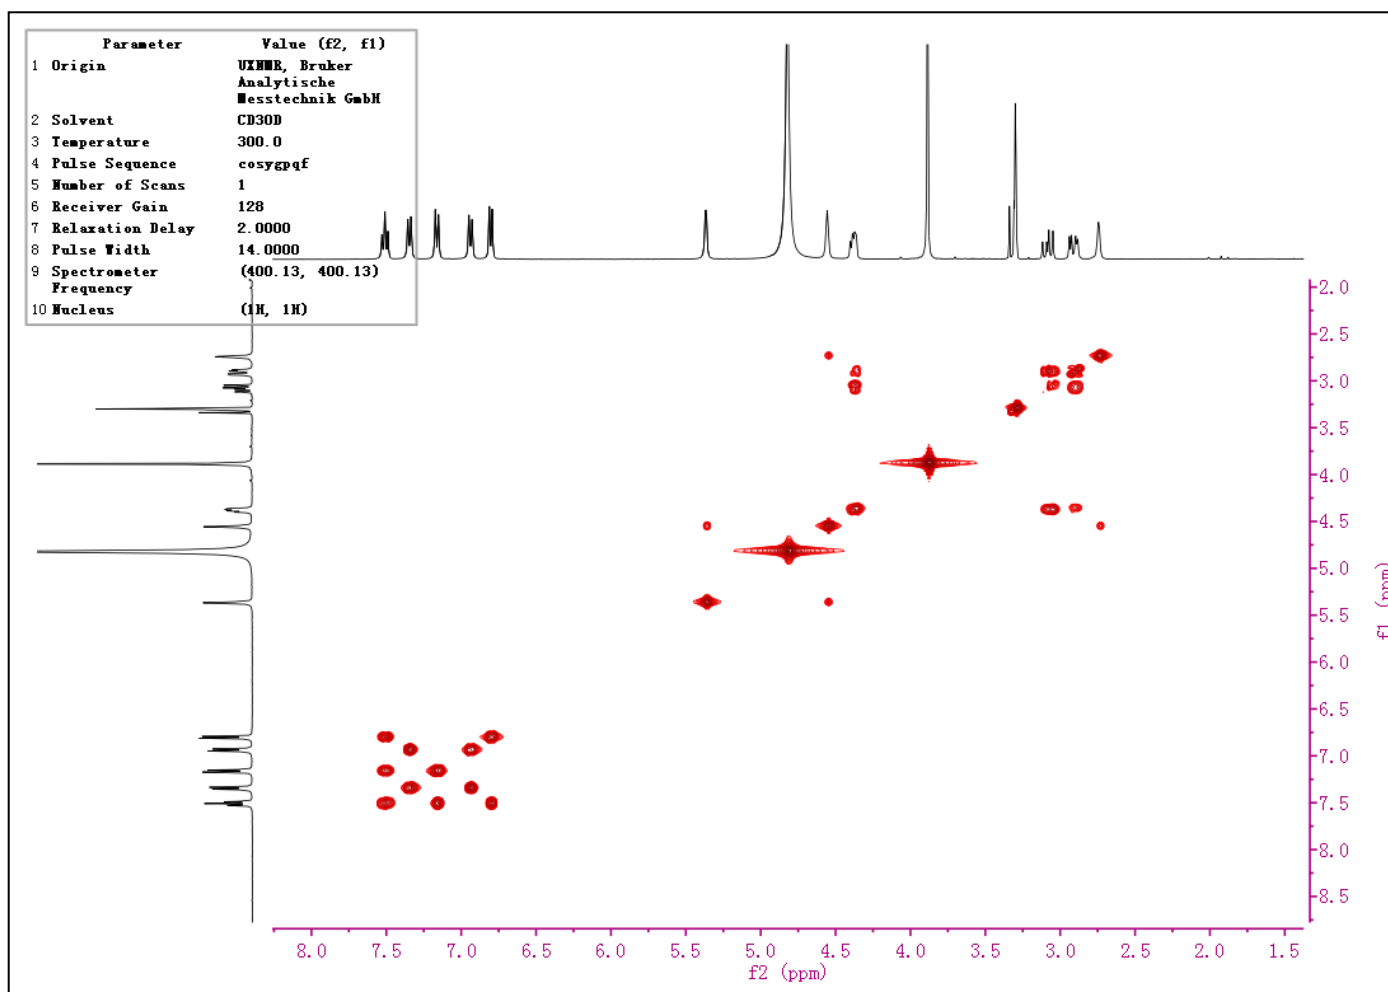

Fig. S3  $^1\text{H}$ - $^1\text{H}$  COSY spectrum of the new compound **1**

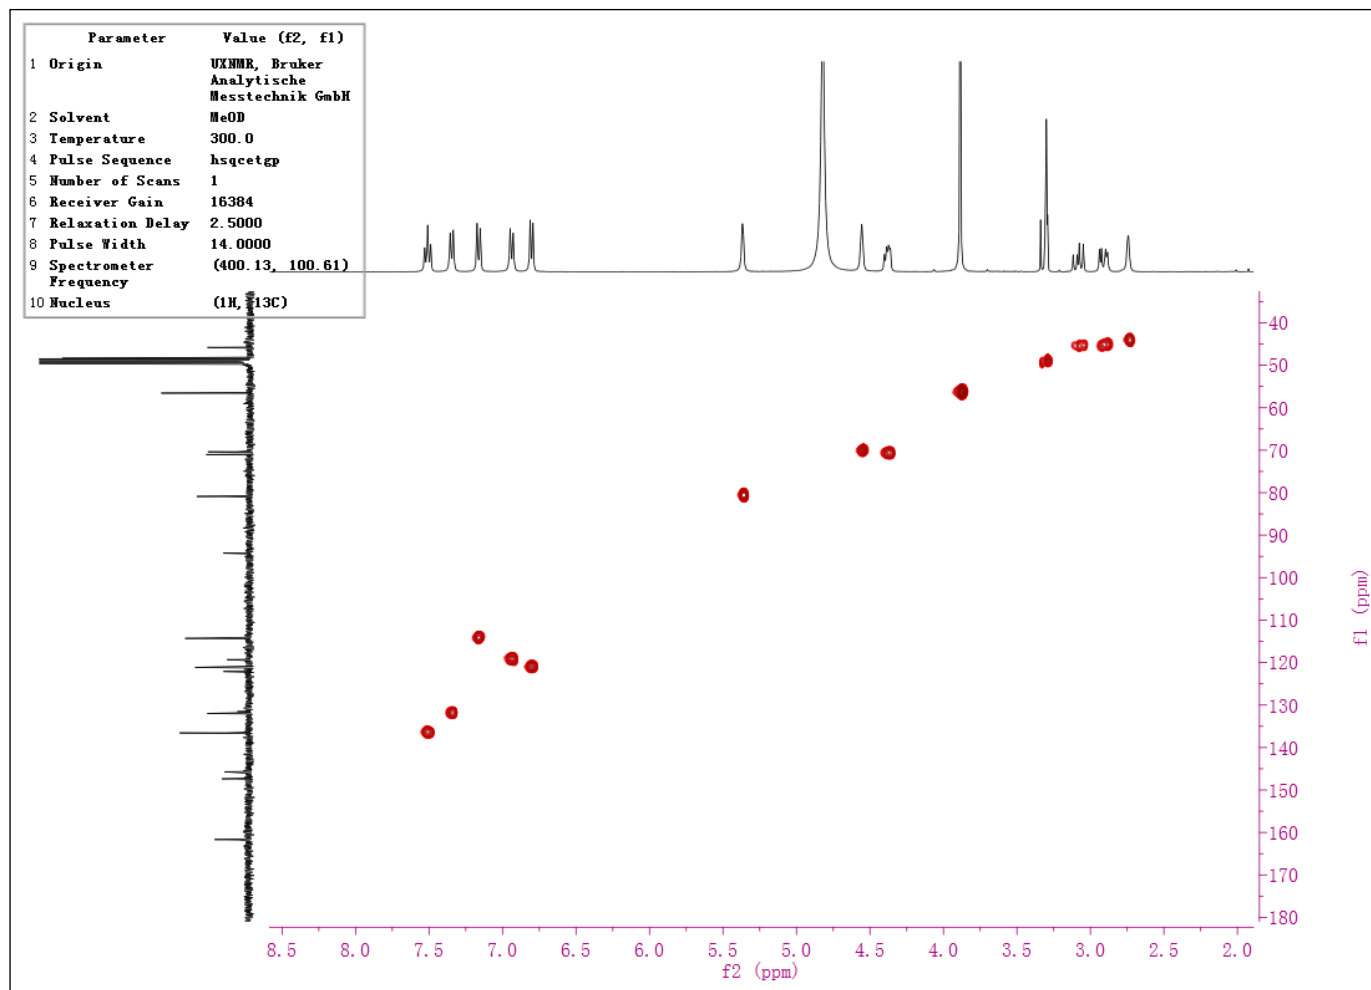

Fig. S4 HSQC spectrum of the new compound 1

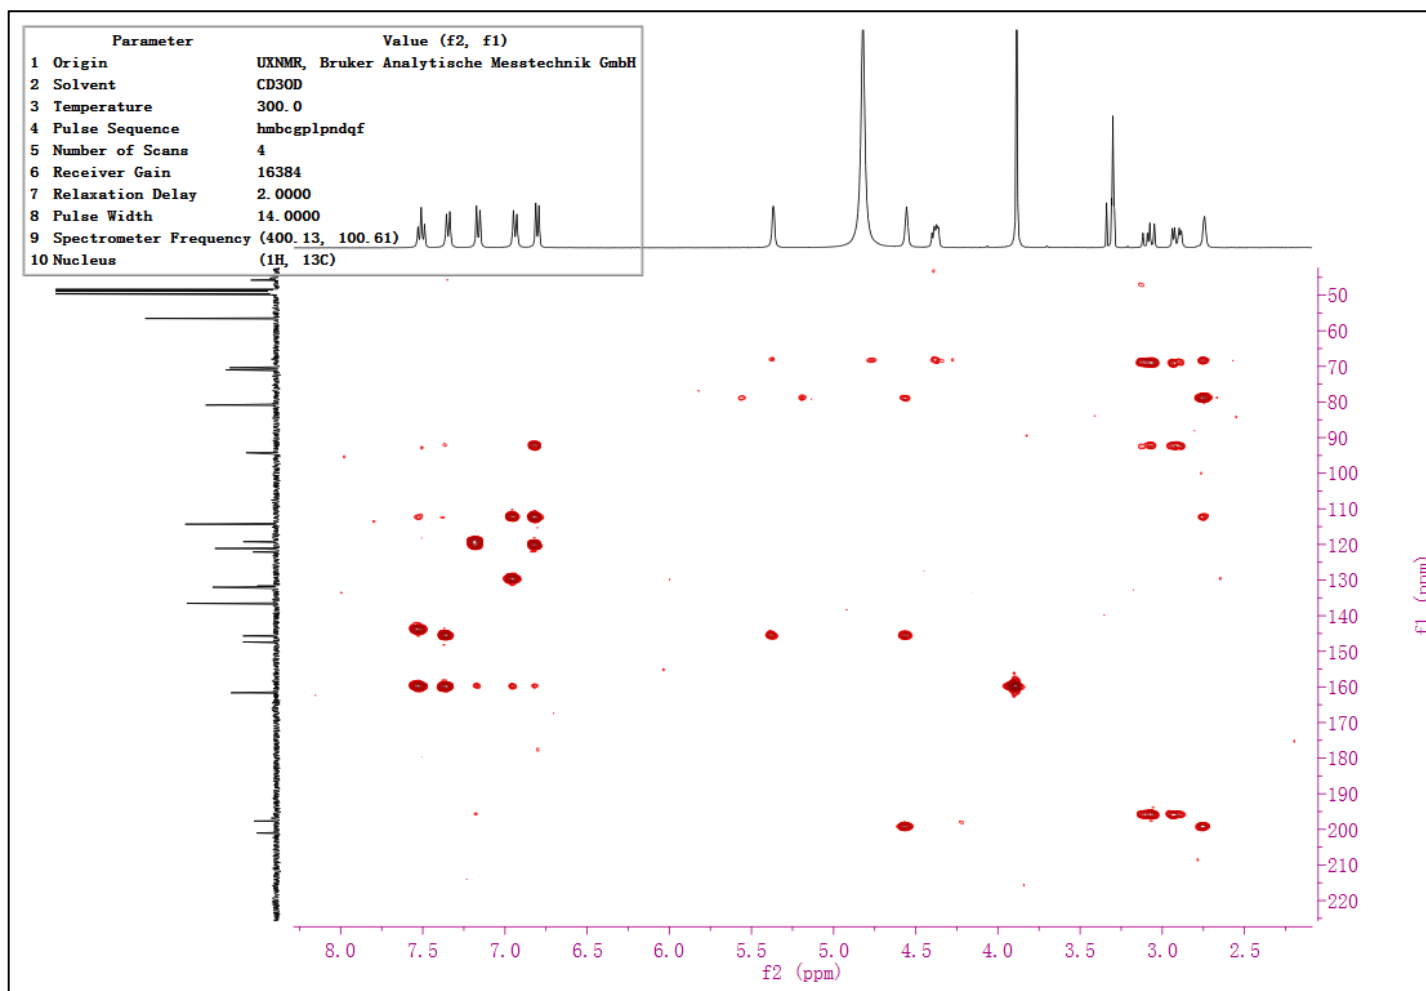

Fig. S5 HMBC spectrum of the new compound **1**

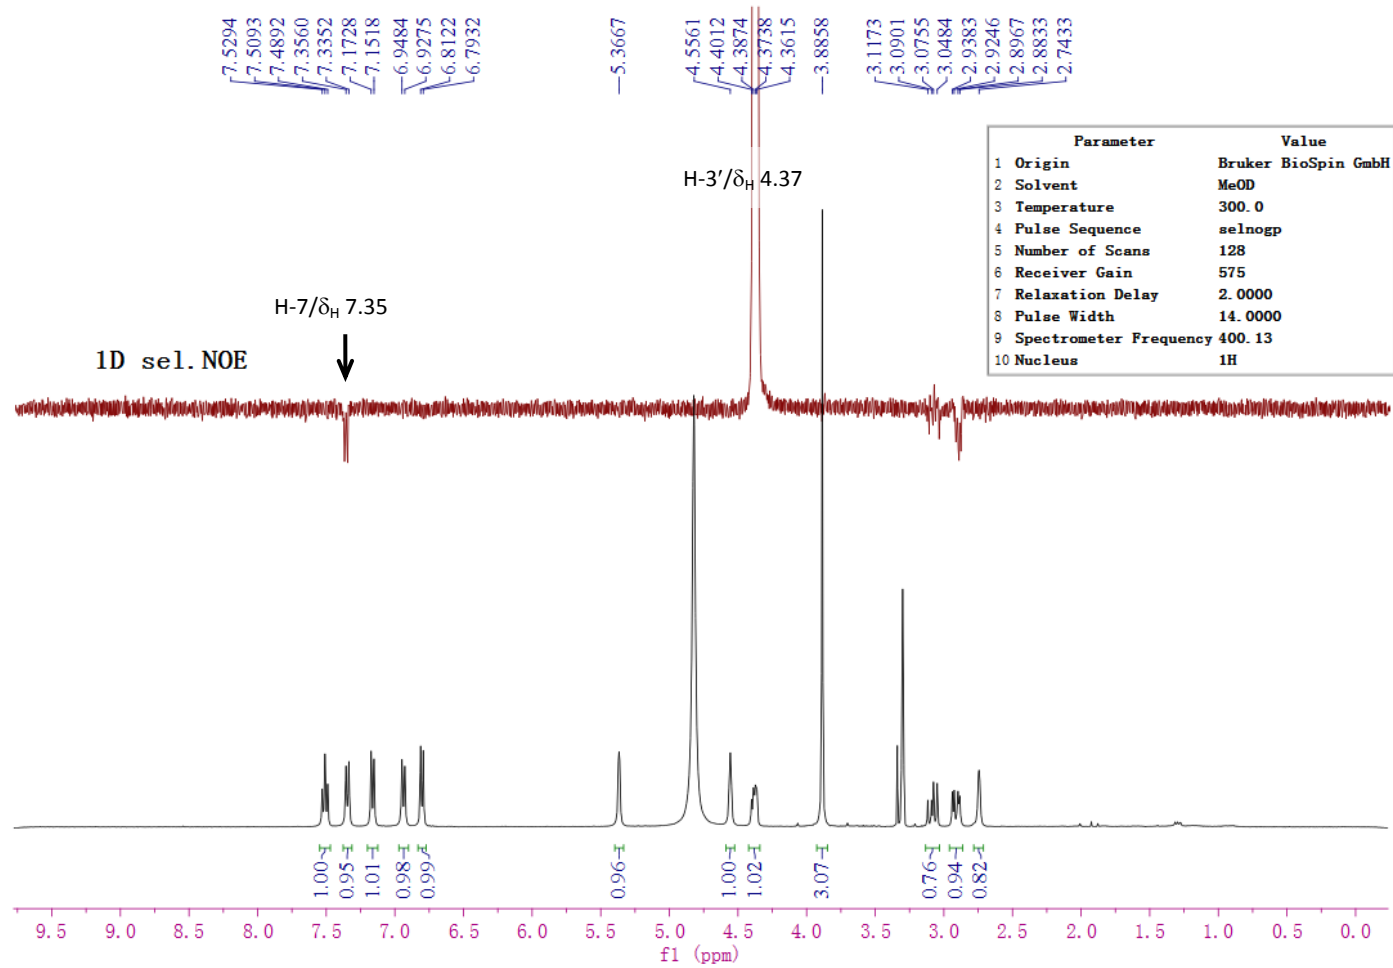

Fig. S6-1 1D sel. Gr. NOE spectrum of the new compound **1**



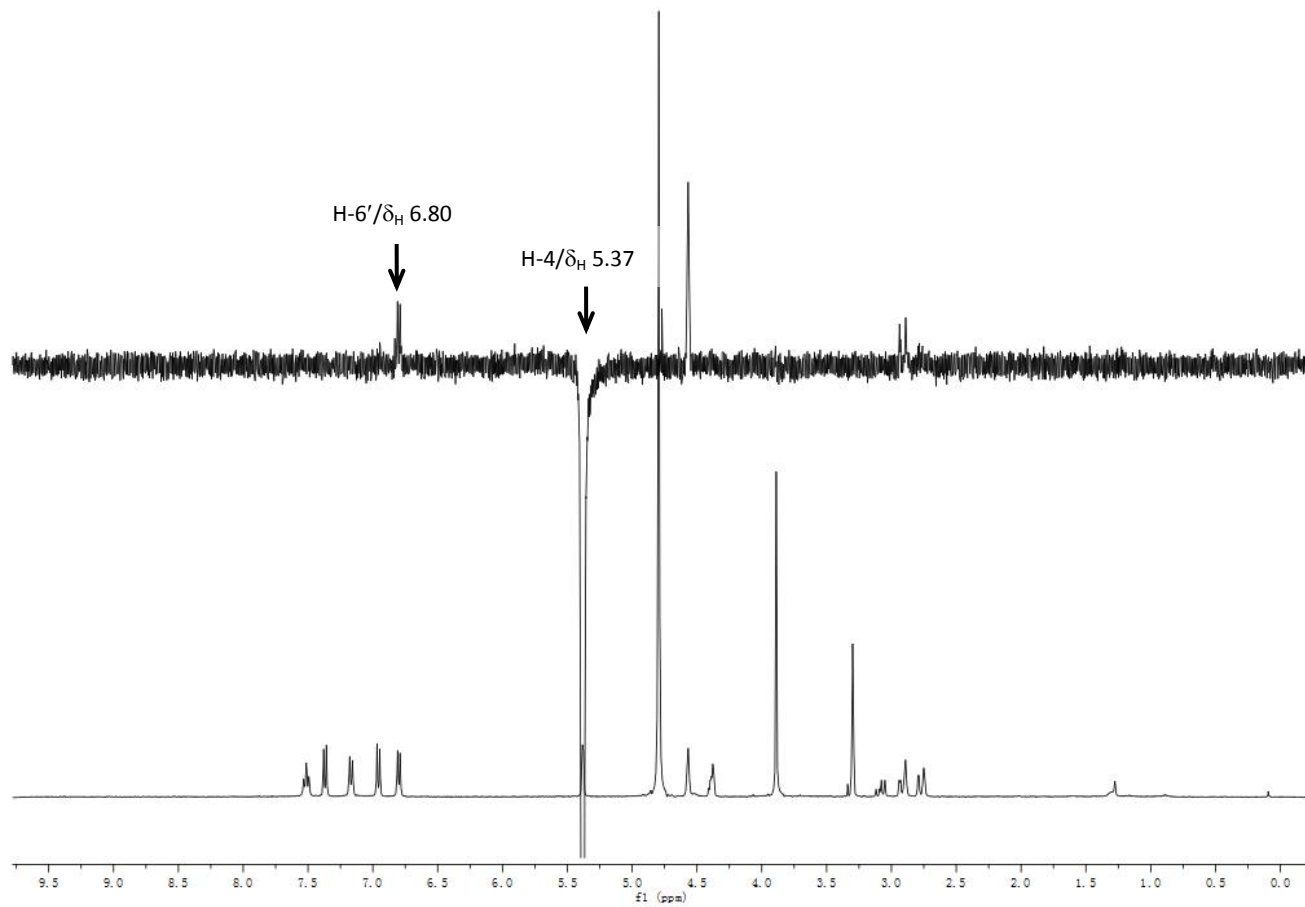

**Fig. S6-2** 1D sel. Gr. NOE spectrum of the new compound **1**

## Elemental Composition Report

Page 1

### Single Mass Analysis

Tolerance = 5.0 PPM / DBE: min = -1.5, max = 50.0

Element prediction: Off

Number of isotope peaks used for i-FIT = 3

Monoisotopic Mass, Even Electron Ions

1132 formula(e) evaluated with 6 results within limits (up to 50 best isotopic matches for each mass)

Elements Used:

C: 0-500 H: 0-1000 N: 0-200 O: 0-200

16-18-7-2-w2-b-i-4

20111028-11 44 (0.374) Cm (44:48)

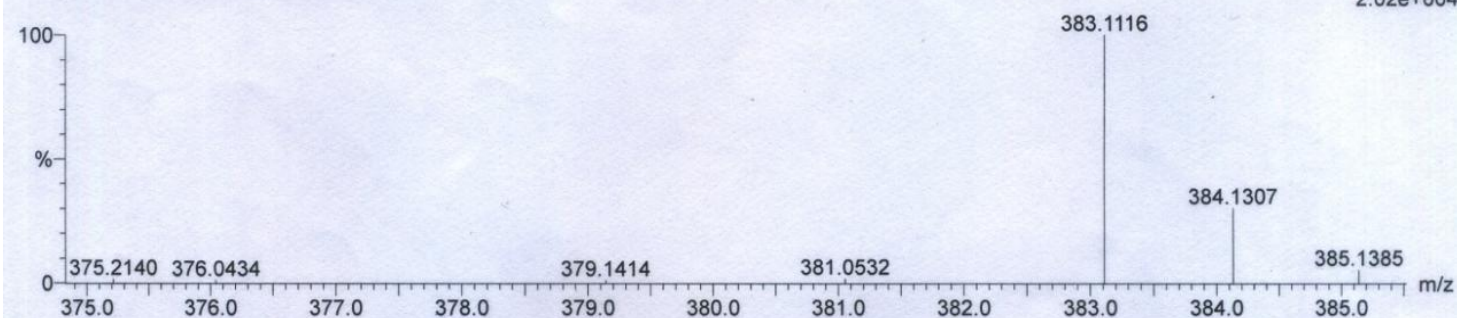

| Minimum: |            |      |      | -1.5 |       |       |          |                   |
|----------|------------|------|------|------|-------|-------|----------|-------------------|
| Maximum: |            | 5.0  | 5.0  | 50.0 |       |       |          |                   |
| Mass     | Calc. Mass | mDa  | PPM  | DBE  | i-FIT | Norm  | Conf (%) | Formula           |
| 383.1116 | 383.1131   | -1.5 | -3.9 | 12.5 | 28.4  | 0.424 | 65.44    | <u>C21 H19 O7</u> |
|          | 383.1117   | -0.1 | -0.3 | 18.5 | 29.5  | 1.525 | 21.76    | C18 H11 N10 O     |
|          | 383.1104   | 1.2  | 3.1  | 13.5 | 30.1  | 2.129 | 11.90    | C17 H15 N6 O5     |
|          | 383.1122   | -0.6 | -1.6 | 0.5  | 33.4  | 5.490 | 0.41     | C5 H19 N8 O12     |
|          | 383.1122   | -0.6 | -1.6 | 11.5 | 33.9  | 5.925 | 0.27     | C3 H7 N22 O2      |
|          | 383.1109   | 0.7  | 1.8  | 6.5  | 34.0  | 6.101 | 0.22     | C2 H11 N18 O6     |

Fig. S7 HRESIMS spectrum of the new compound 1

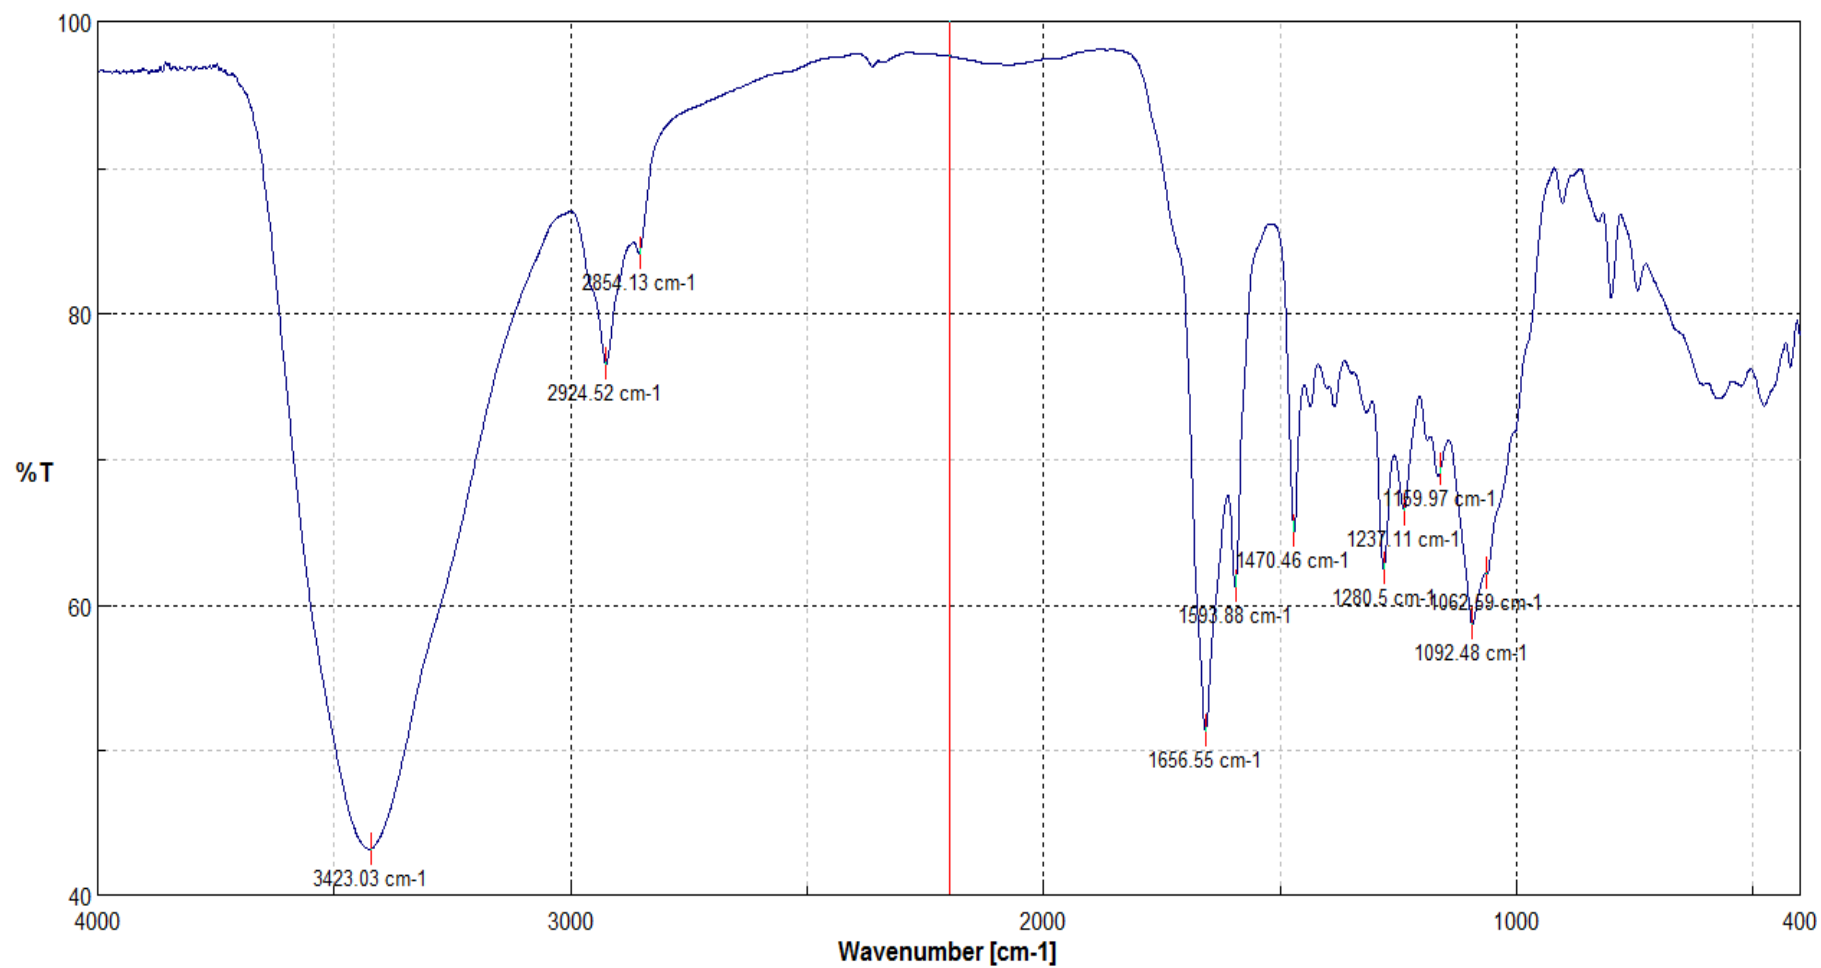

Fig. S8 IR spectrum of the new compound 1

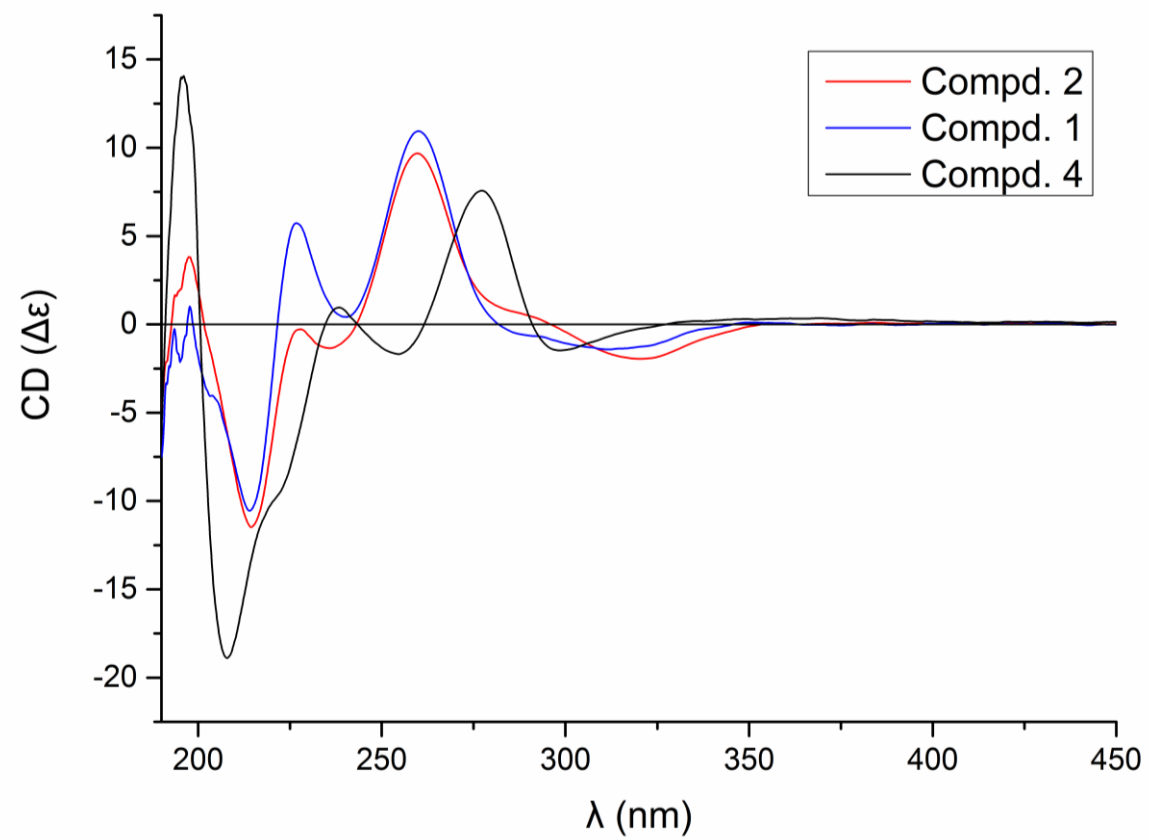

**Fig. S9** CD spectrum of the compounds **1** and **2**

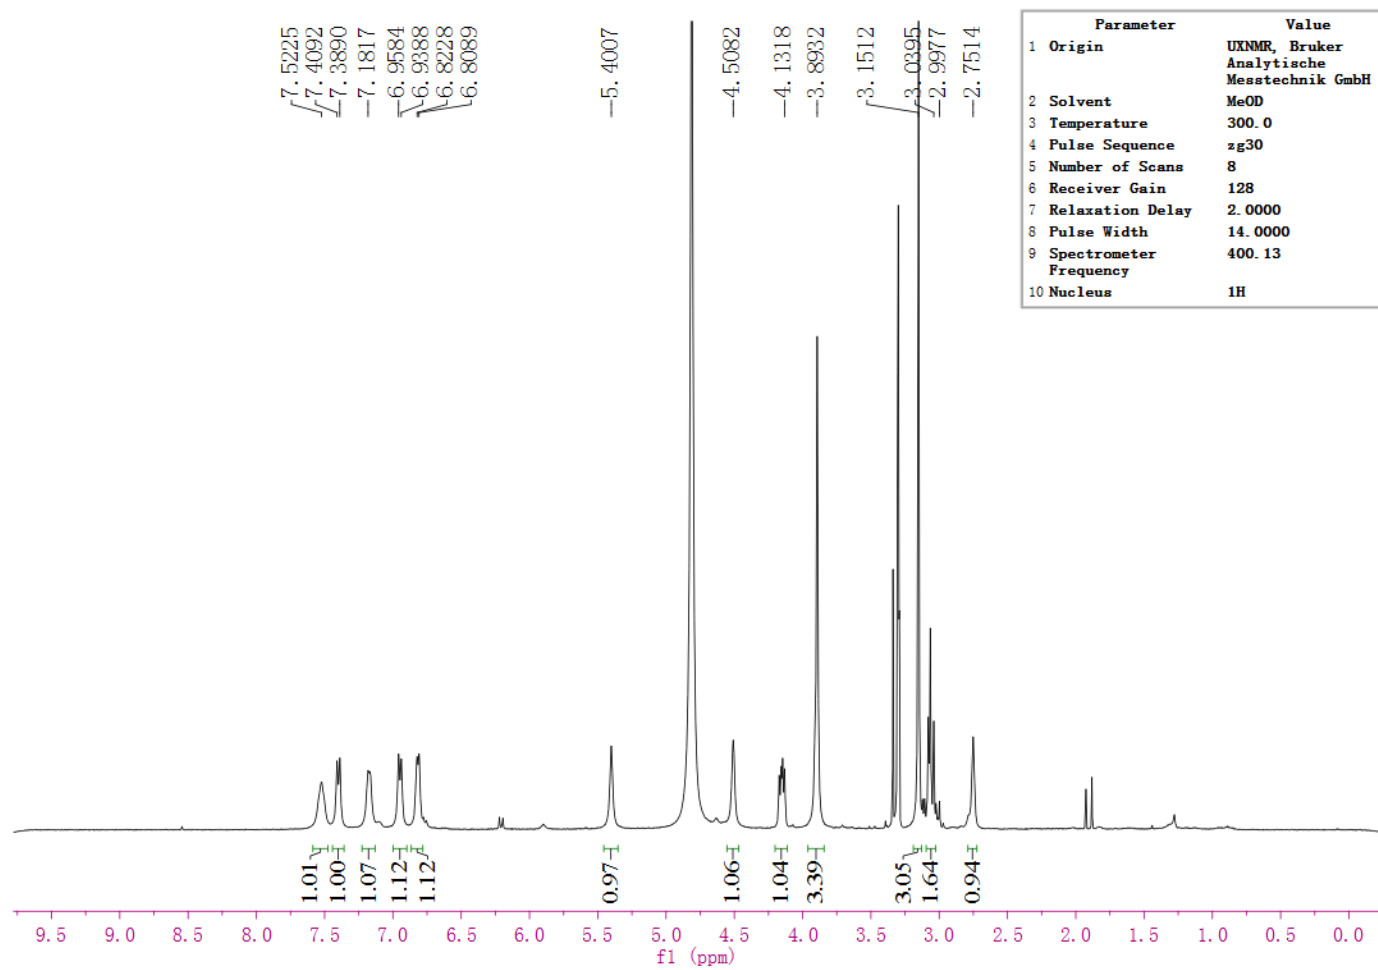

Fig. S10 <sup>1</sup>H-NMR spectrum of the new compound 2

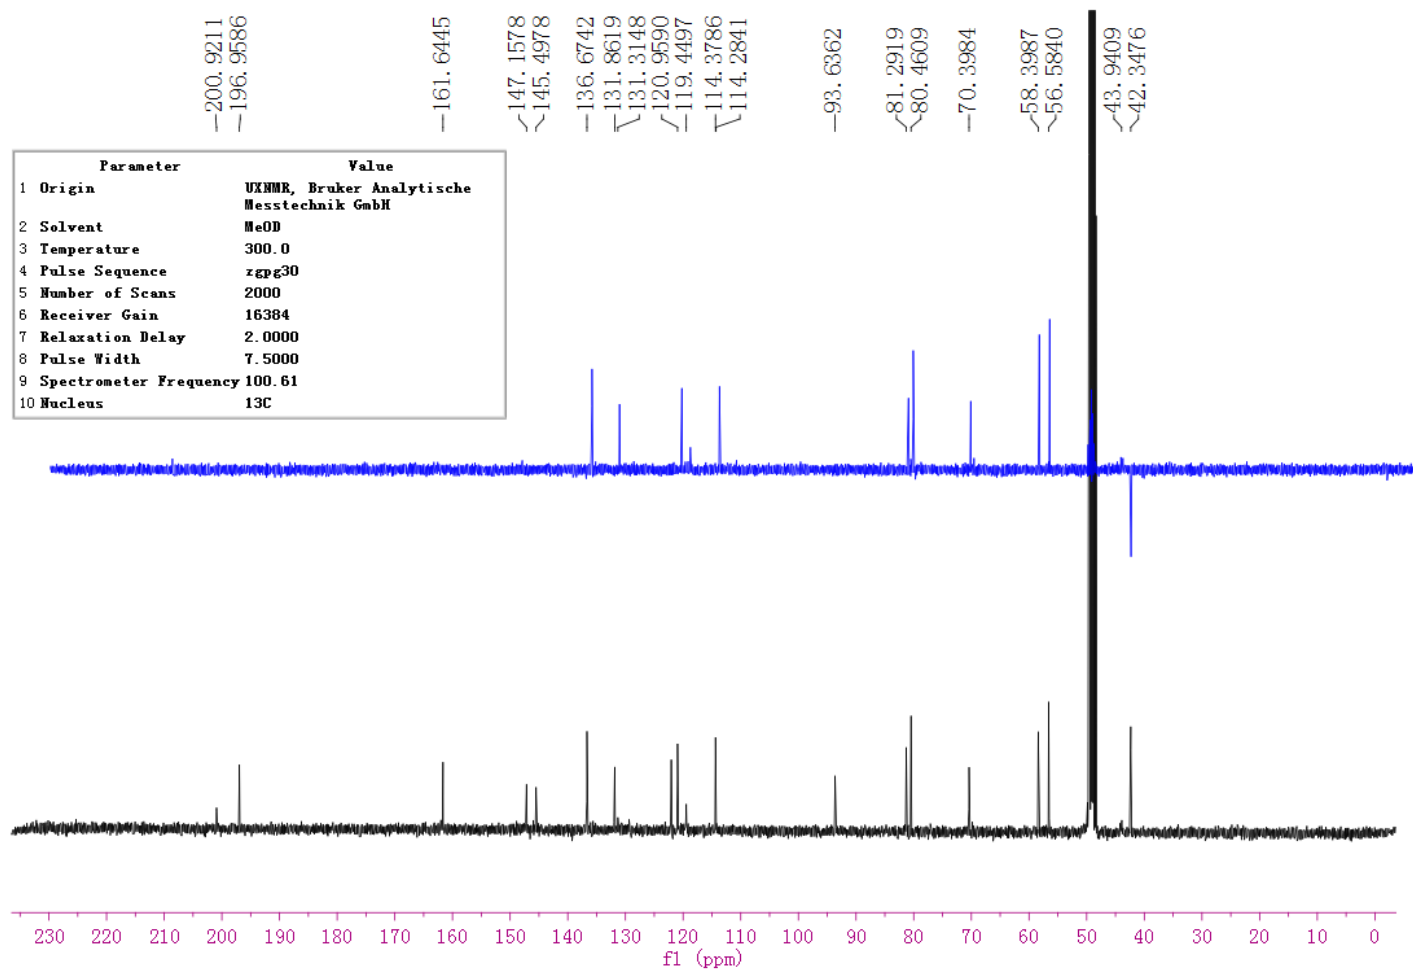

Fig. S11 <sup>13</sup>C-NMR & DEPT-135 spectrum of the new compound 2



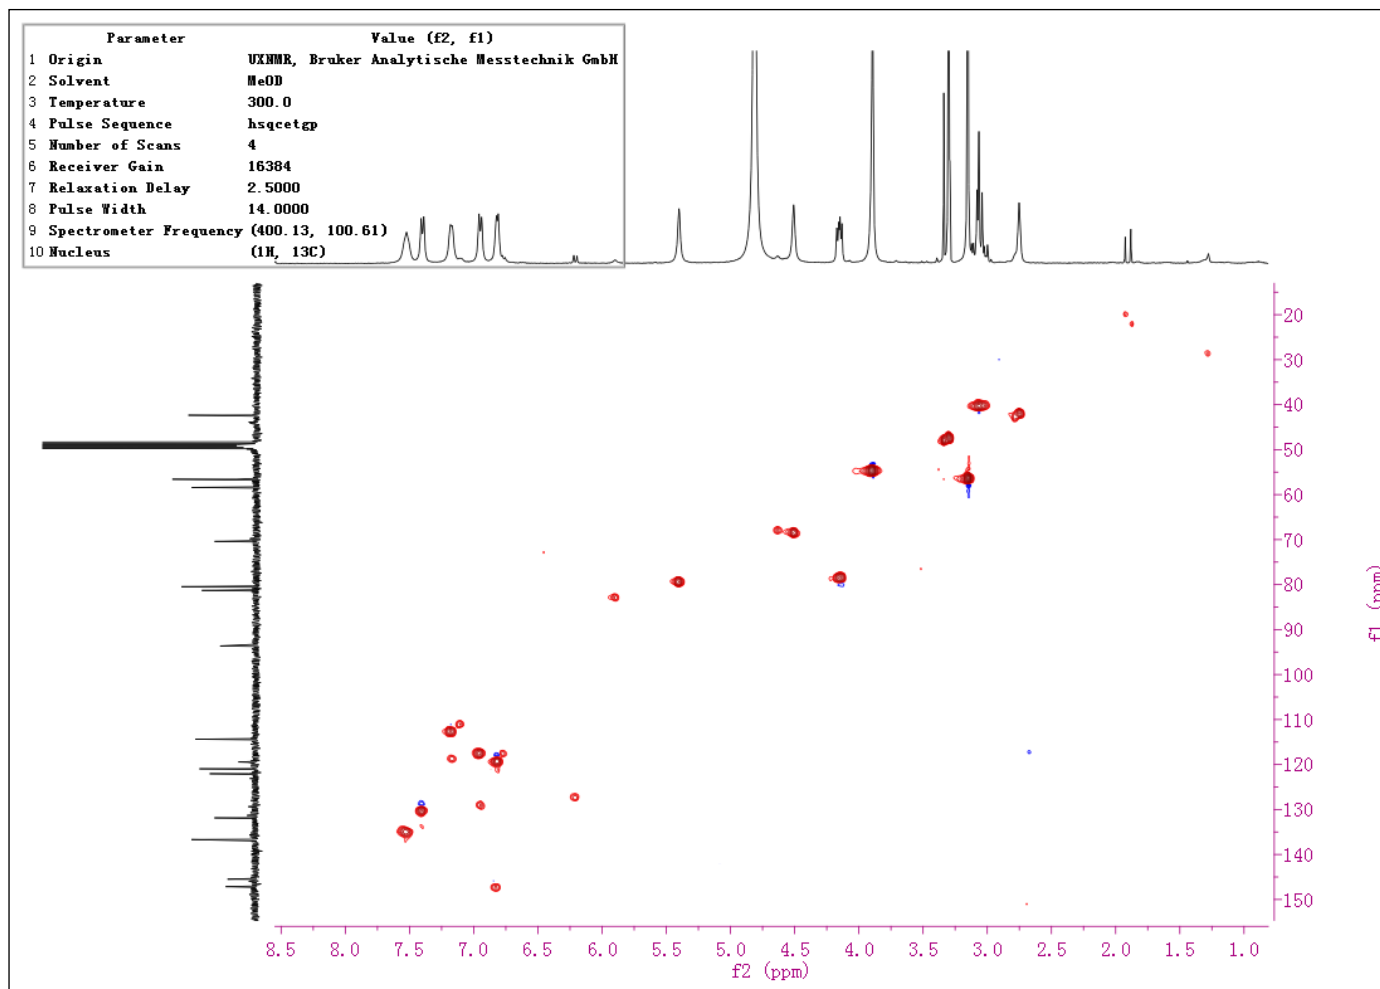

Fig. S13 HSQC spectrum of the new compound 2



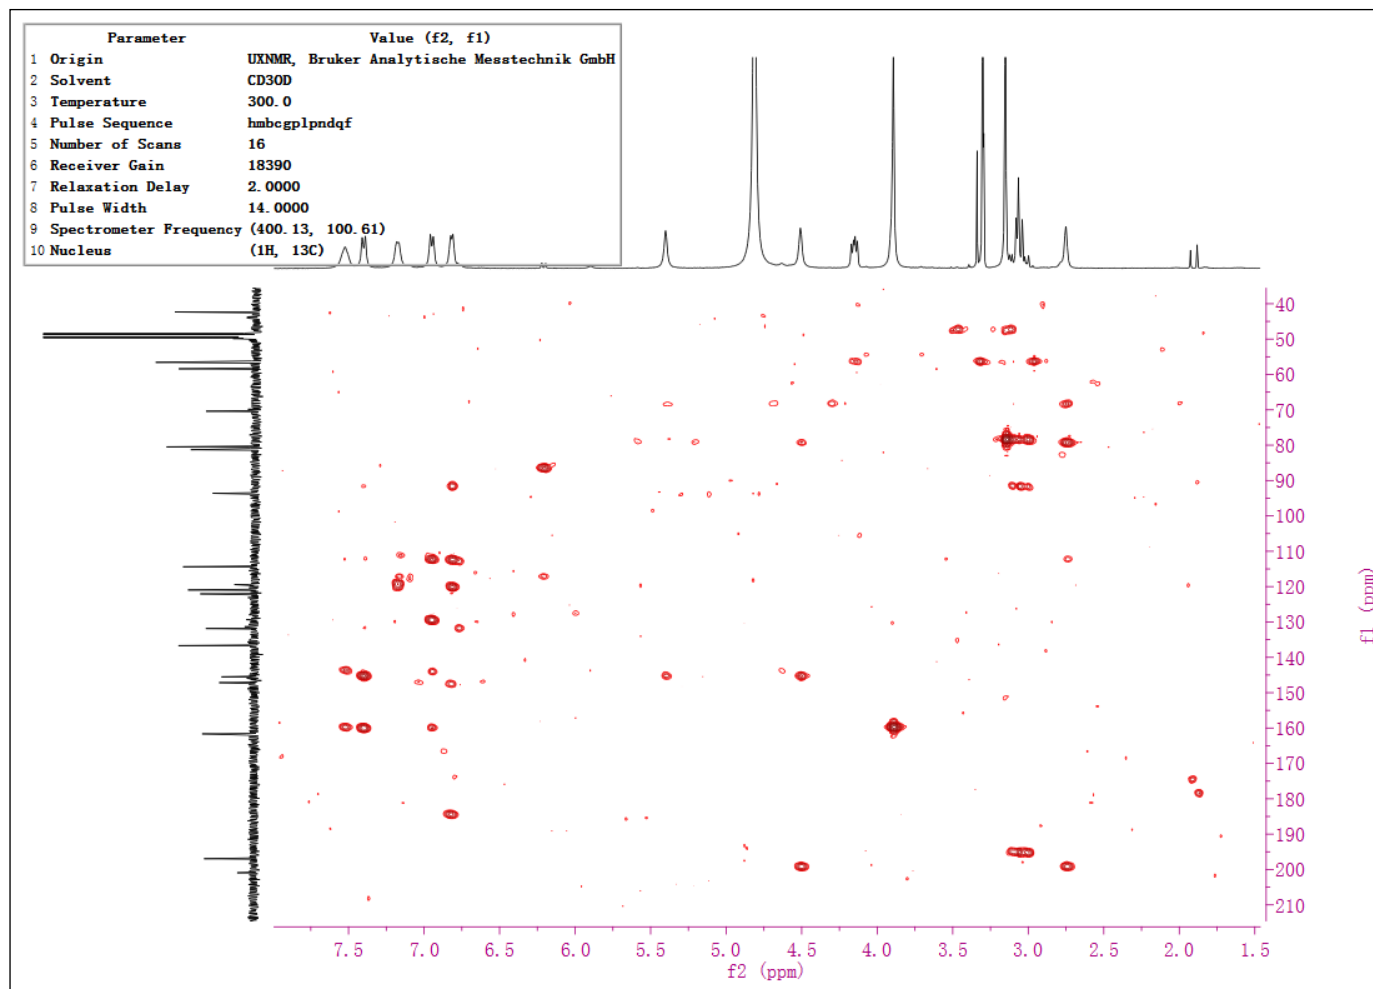

Fig. S14 HMBC spectrum of the new compound 2

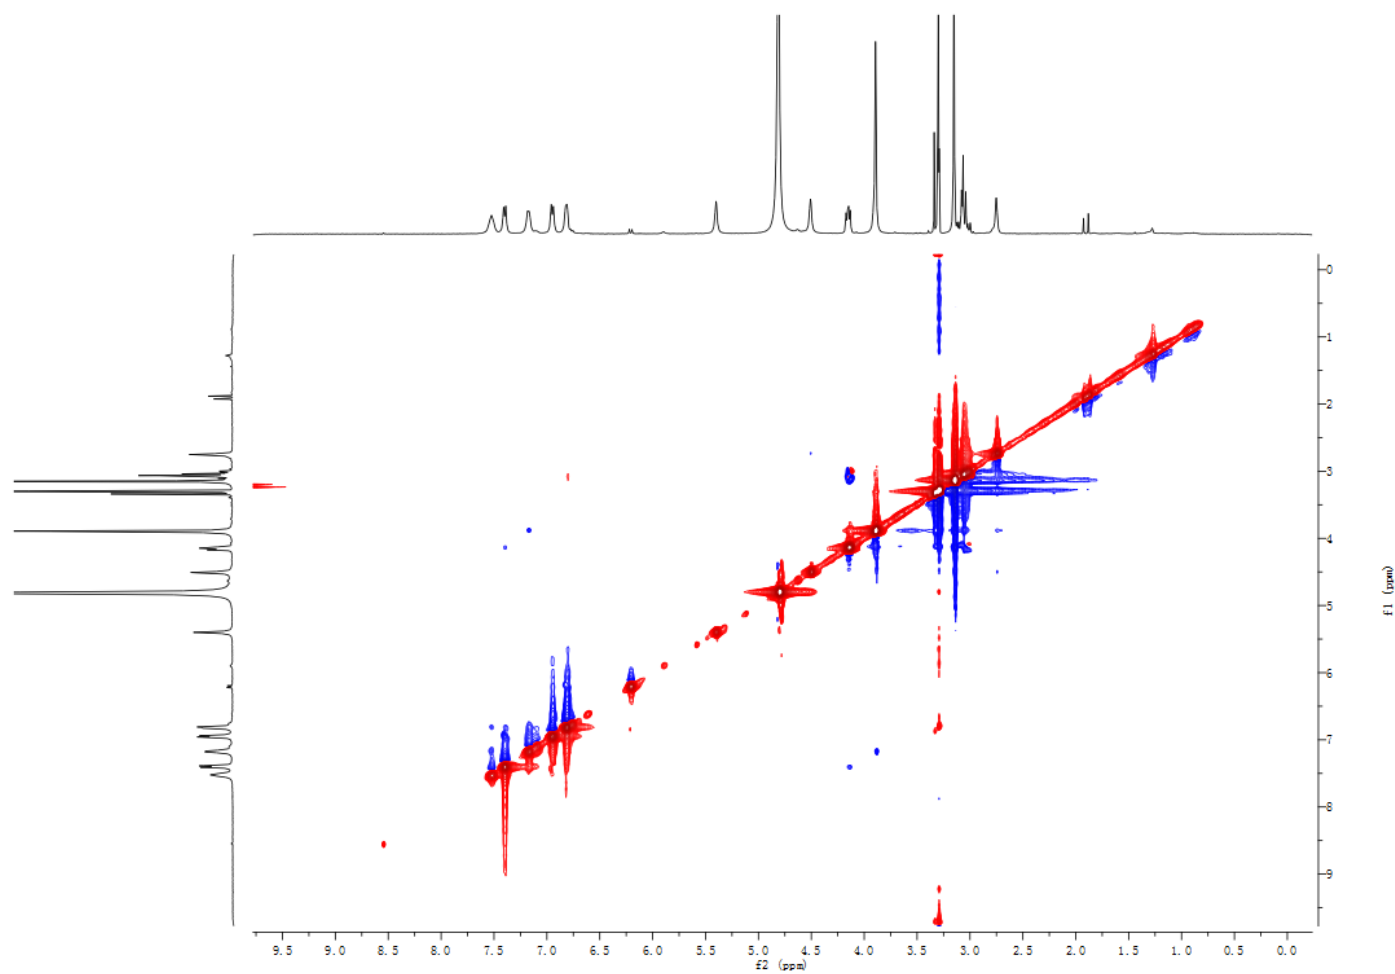

**Fig. S15** ROESY spectrum of the new compound **2**

# Elemental Composition Report

## Single Mass Analysis

Tolerance = 5.0 PPM / DBE: min = -1.5, max = 50.0

Element prediction: Off

Number of isotope peaks used for i-FIT = 3

Monoisotopic Mass, Even Electron Ions

1239 formula(e) evaluated with 8 results within limits (up to 50 best isotopic matches for each mass)

Elements Used:

C: 0-500 H: 0-1000 N: 0-200 O: 0-200

16-18-7-2-w2-b-g-3

20111028-13 58 (0.479) Cm (57:62)

1: TOF MS ES+  
8.92e+004

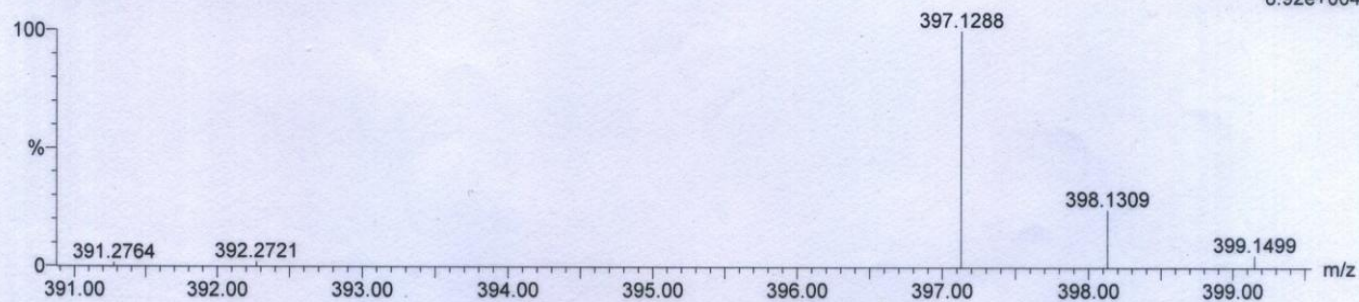

Minimum: -1.5  
Maximum: 5.0 5.0 50.0

| Mass     | Calc. Mass | mDa  | PPM  | DBE  | i-FIT | Norm   | Conf (%) | Formula           |
|----------|------------|------|------|------|-------|--------|----------|-------------------|
| 397.1288 | 397.1287   | 0.1  | 0.3  | 12.5 | 25.6  | 0.052  | 94.91    | <u>C22 H21 O7</u> |
|          | 397.1301   | -1.3 | -3.3 | 17.5 | 28.7  | 3.177  | 4.17     | C23 H17 N4 O3     |
|          | 397.1274   | 1.4  | 3.5  | 18.5 | 30.2  | 4.729  | 0.88     | C19 H13 N10 O     |
|          | 397.1306   | -1.8 | -4.5 | 10.5 | 34.6  | 9.075  | 0.01     | C8 H13 N16 O4     |
|          | 397.1306   | -1.8 | -4.5 | -0.5 | 34.6  | 9.111  | 0.01     | C10 H25 N2 O14    |
|          | 397.1292   | -0.4 | -1.0 | 5.5  | 35.0  | 9.439  | 0.01     | C7 H17 N12 O8     |
|          | 397.1279   | 0.9  | 2.3  | 0.5  | 35.5  | 9.966  | 0.00     | C6 H21 N8 O12     |
|          | 397.1279   | 0.9  | 2.3  | 11.5 | 36.0  | 10.436 | 0.00     | C4 H9 N22 O2      |

Fig. S16 HRESIMS spectrum of the new compound 2

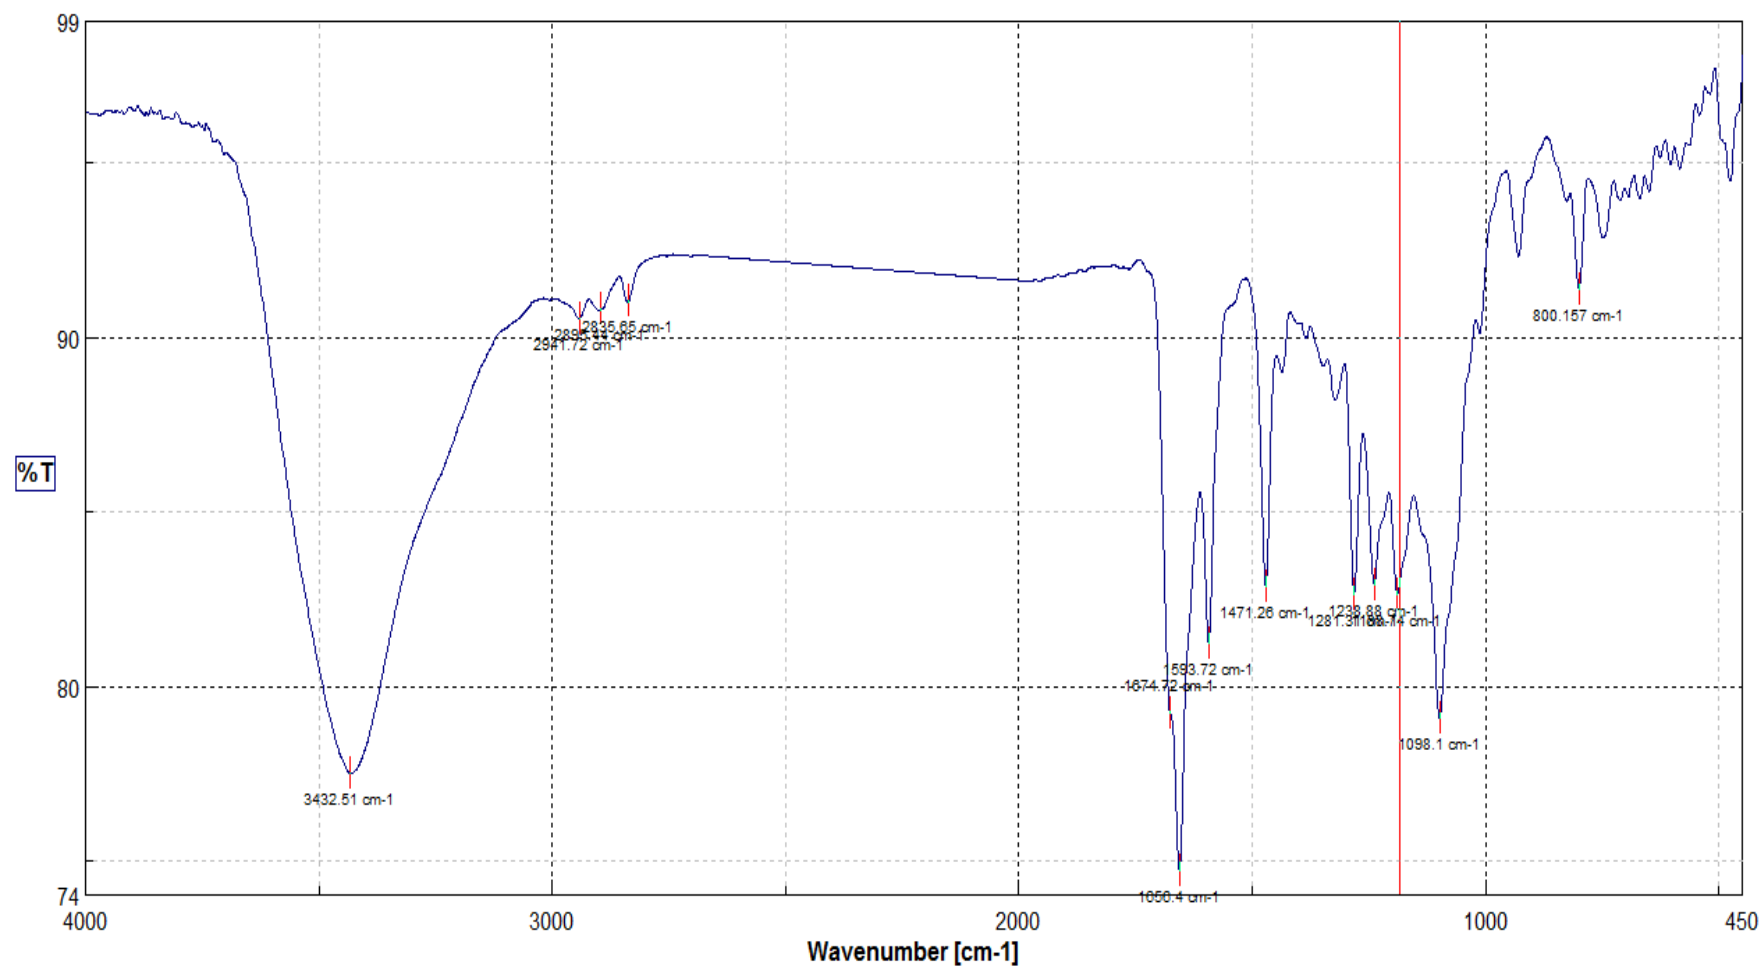

Fig. S17 IR spectrum of the new compound 2

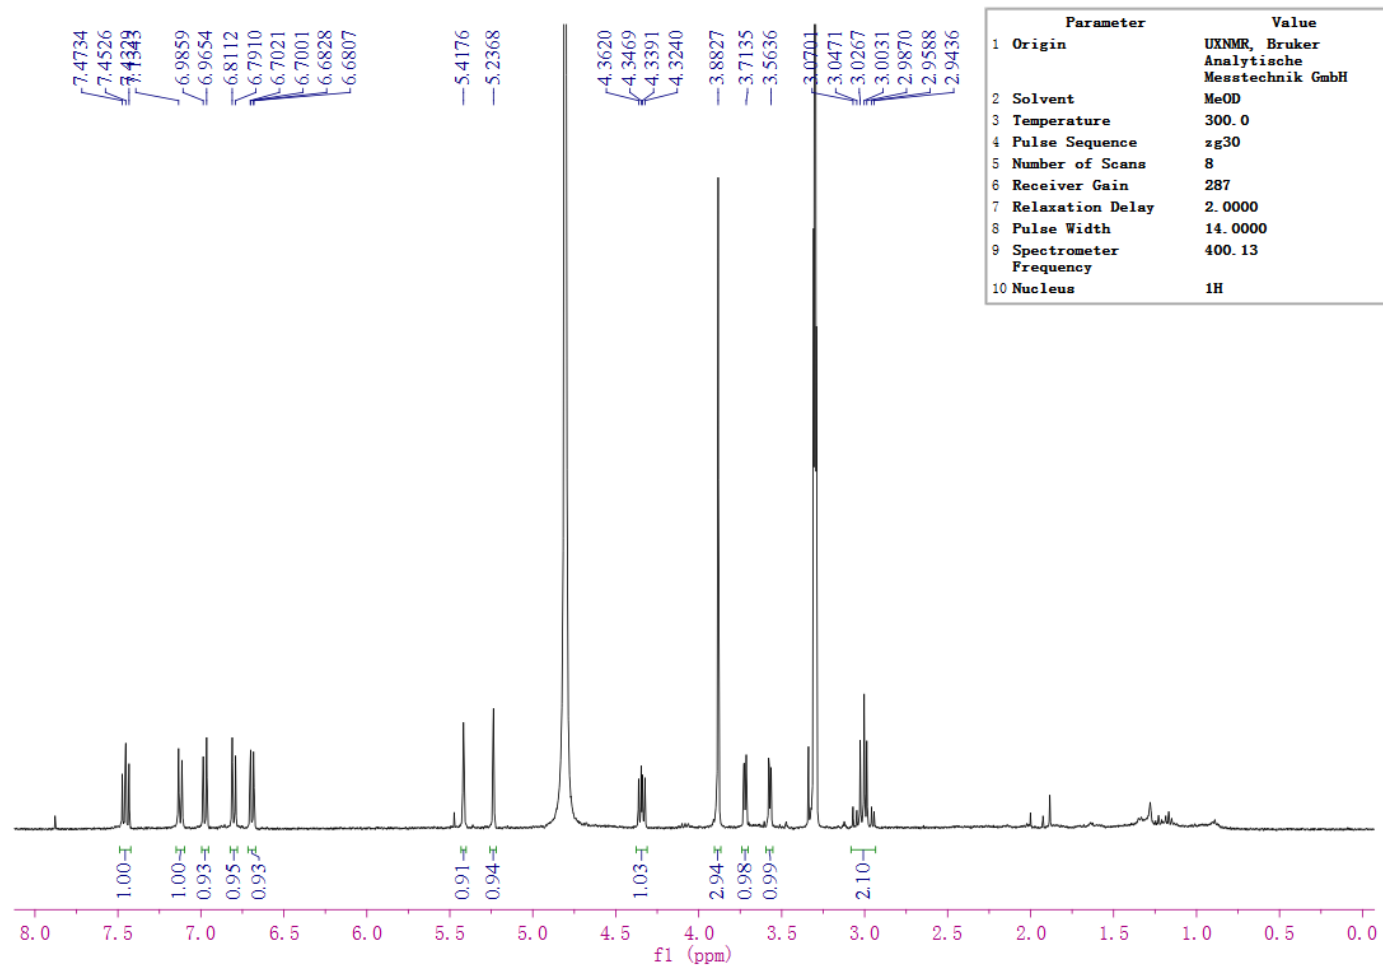

Fig. S18 <sup>1</sup>H-NMR spectrum of the new compound **3**

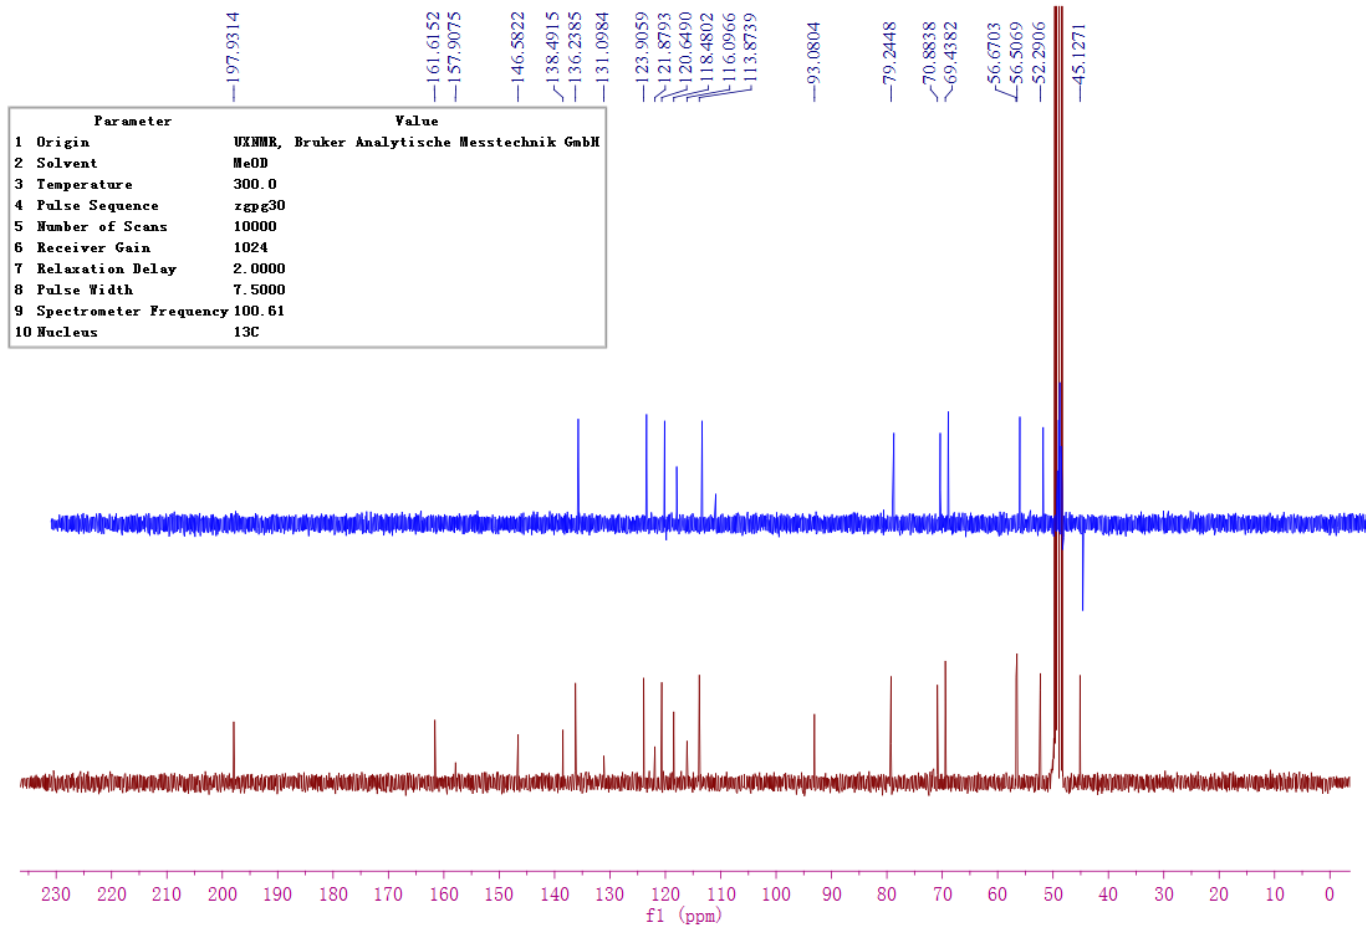

Fig. S19  $^{13}\text{C}$ -NMR & DEPT-135 spectrum of the new compound **3**

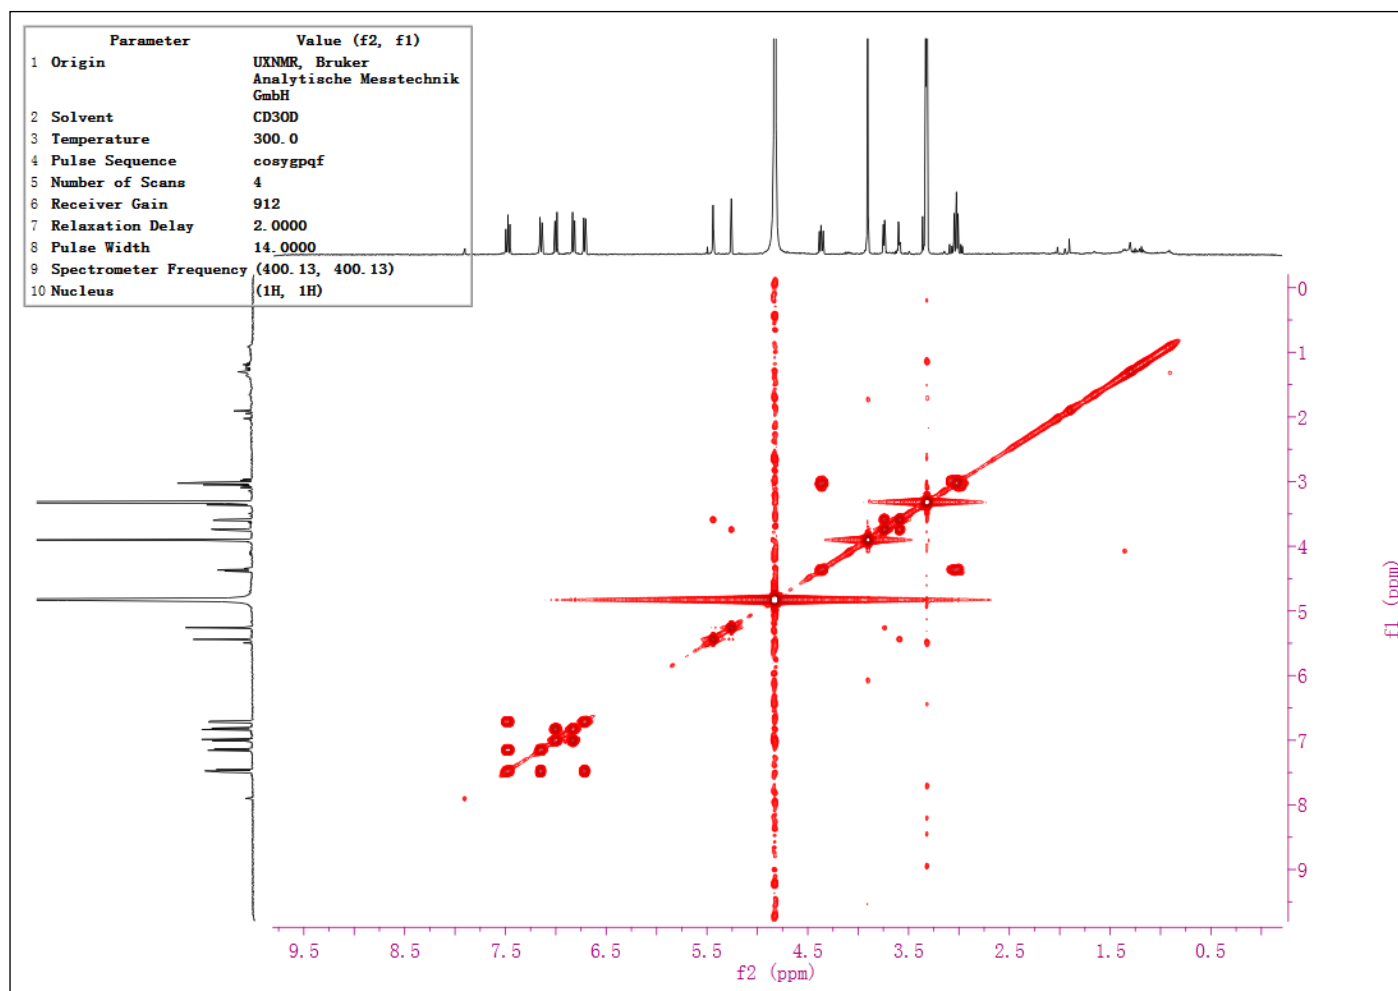

Fig. S20  $^1\text{H}$ - $^1\text{H}$  COSY spectrum of the new compound **3**

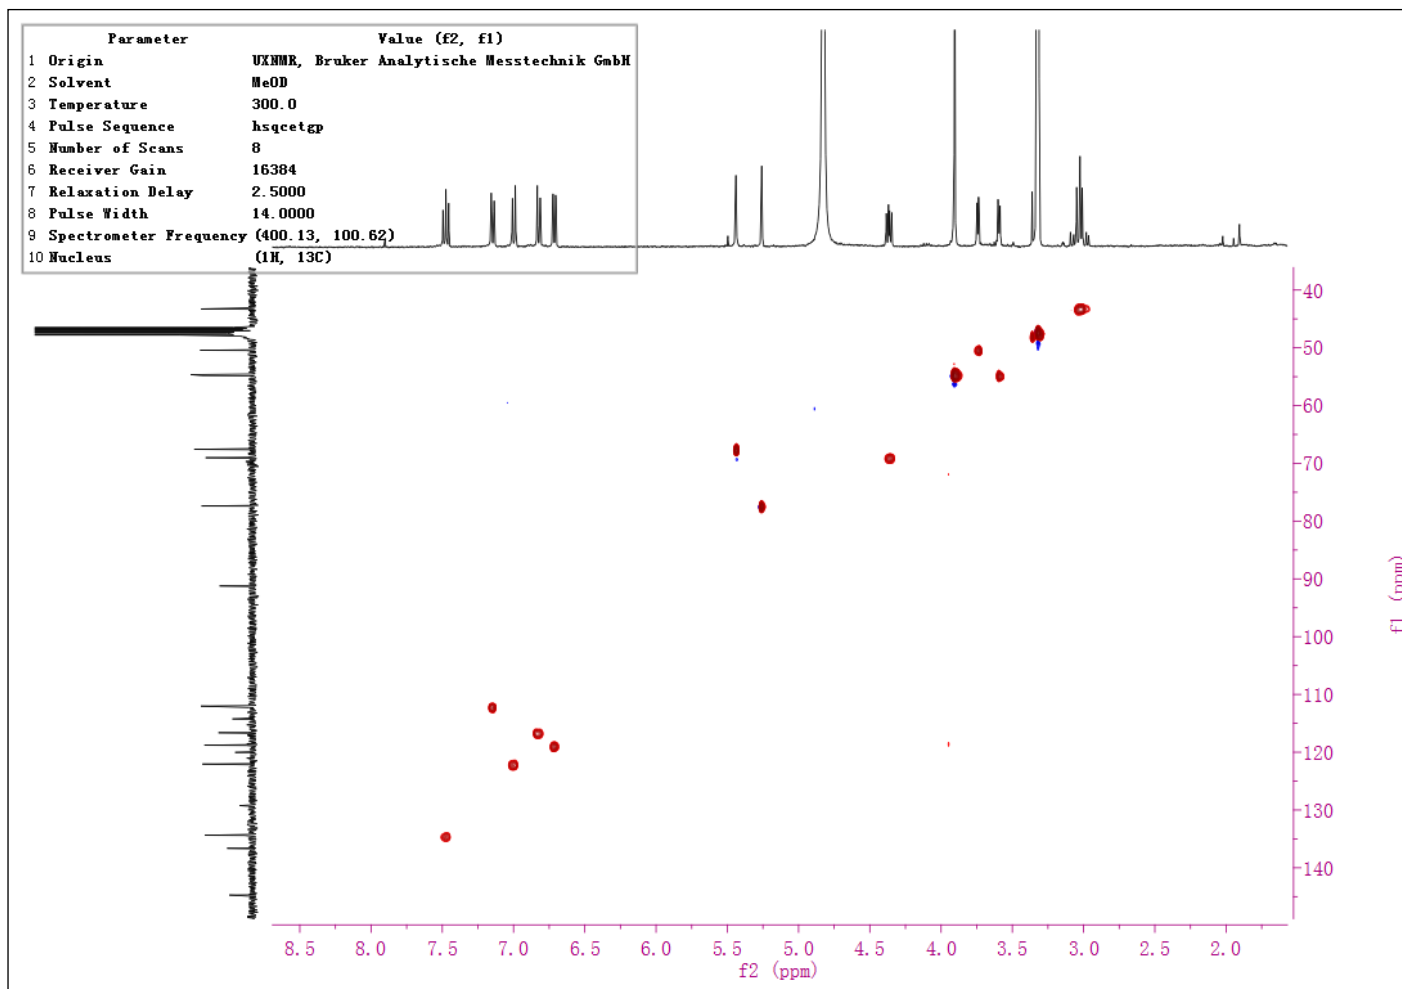

Fig. S21 HSQC spectrum of the new compound **3**



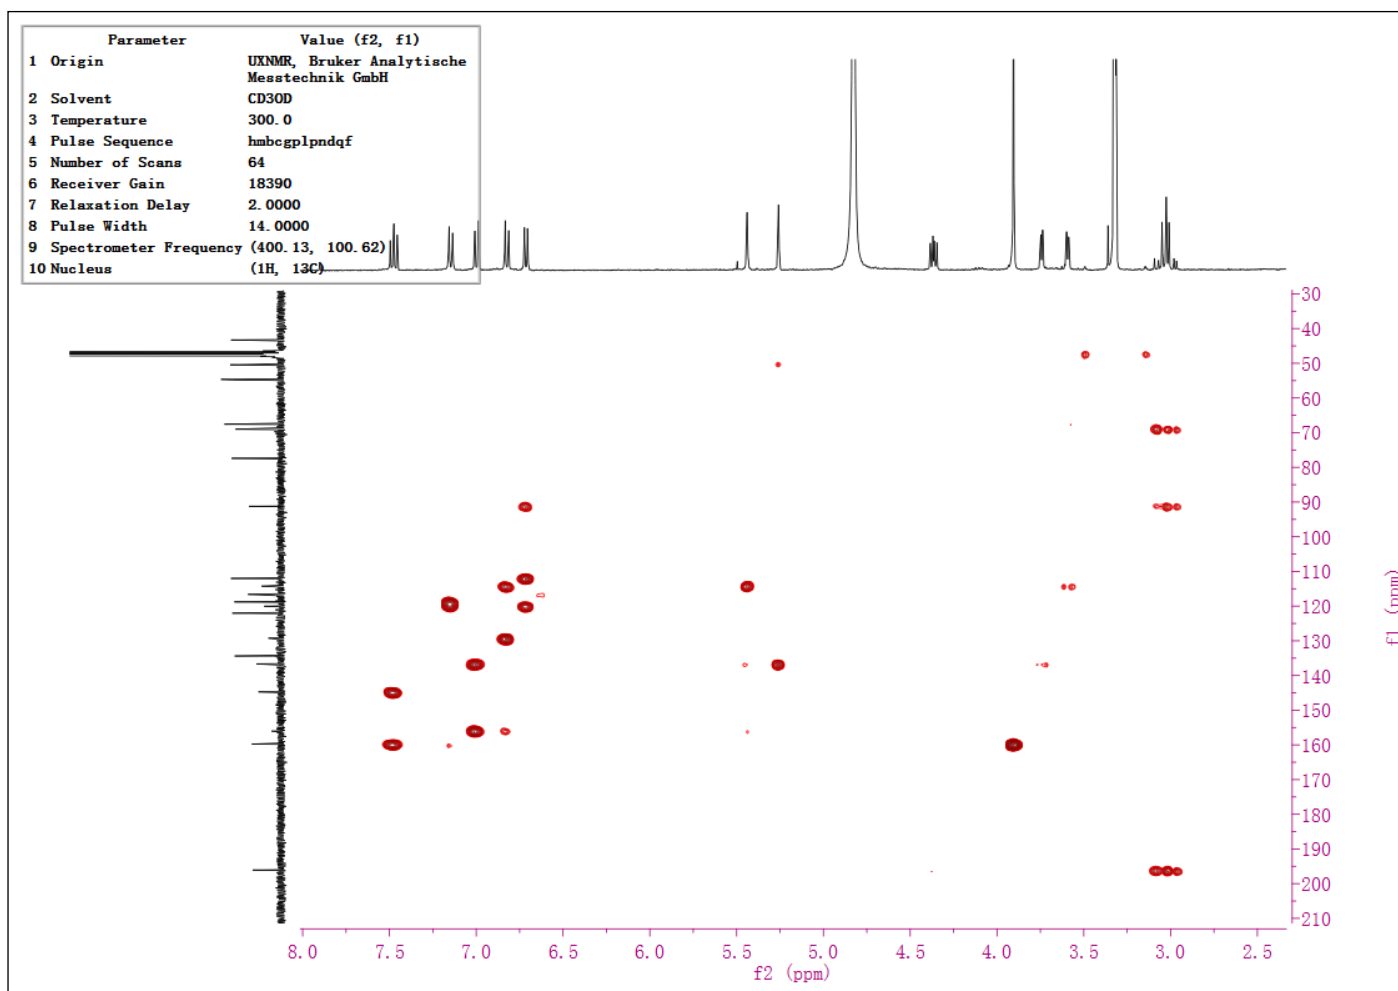

Fig. S22 HMBC spectrum of the new compound **3**

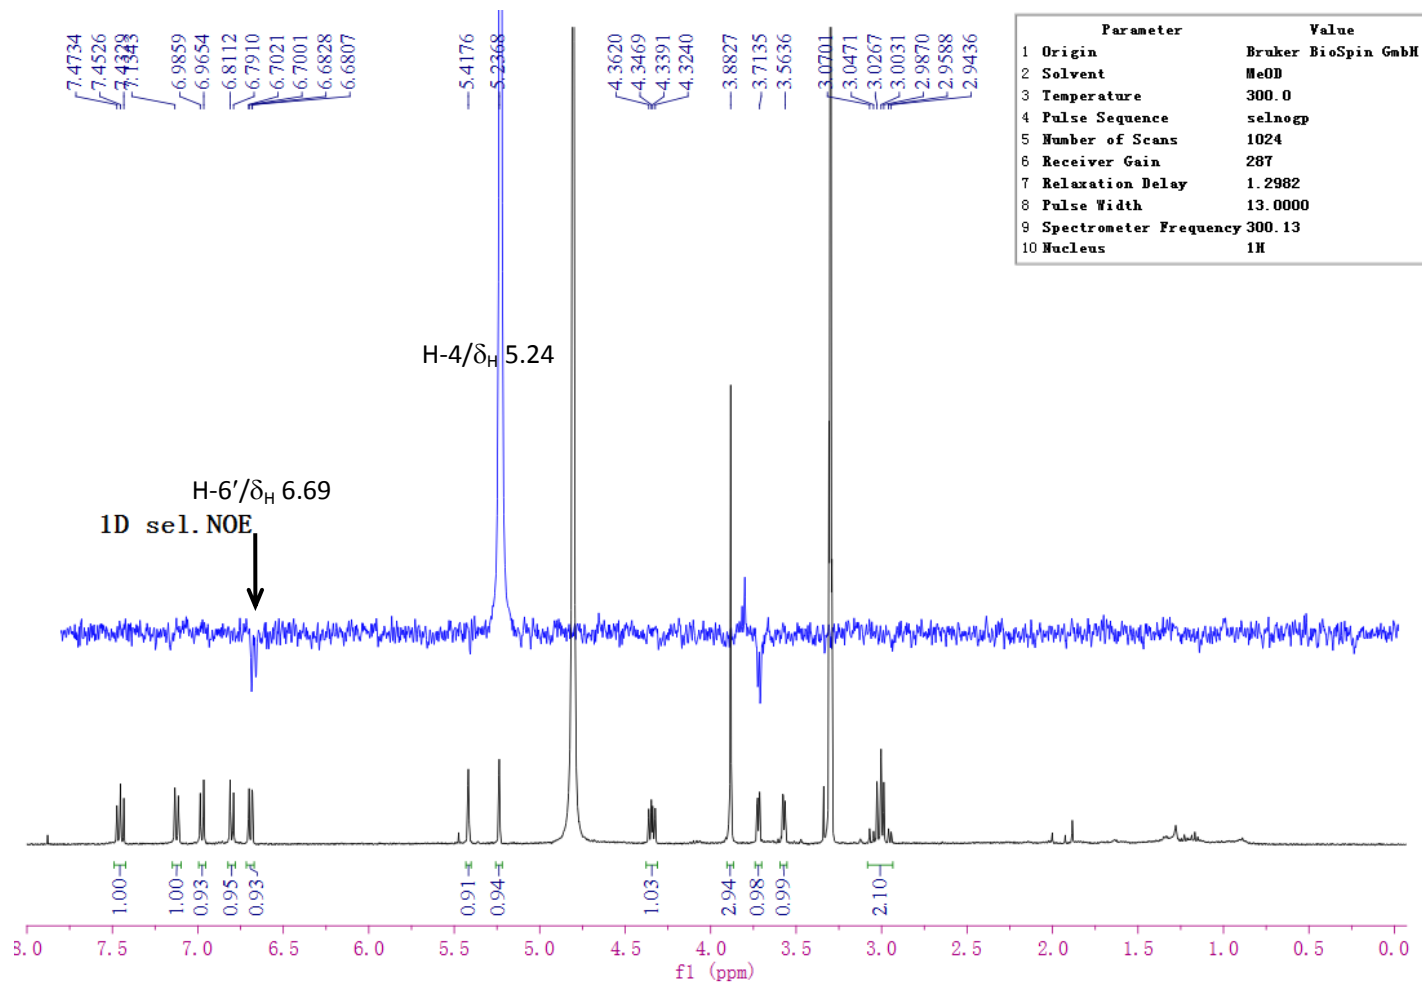

Fig. S23-1 1D sel. Gr. NOE spectrum of the new compound 3

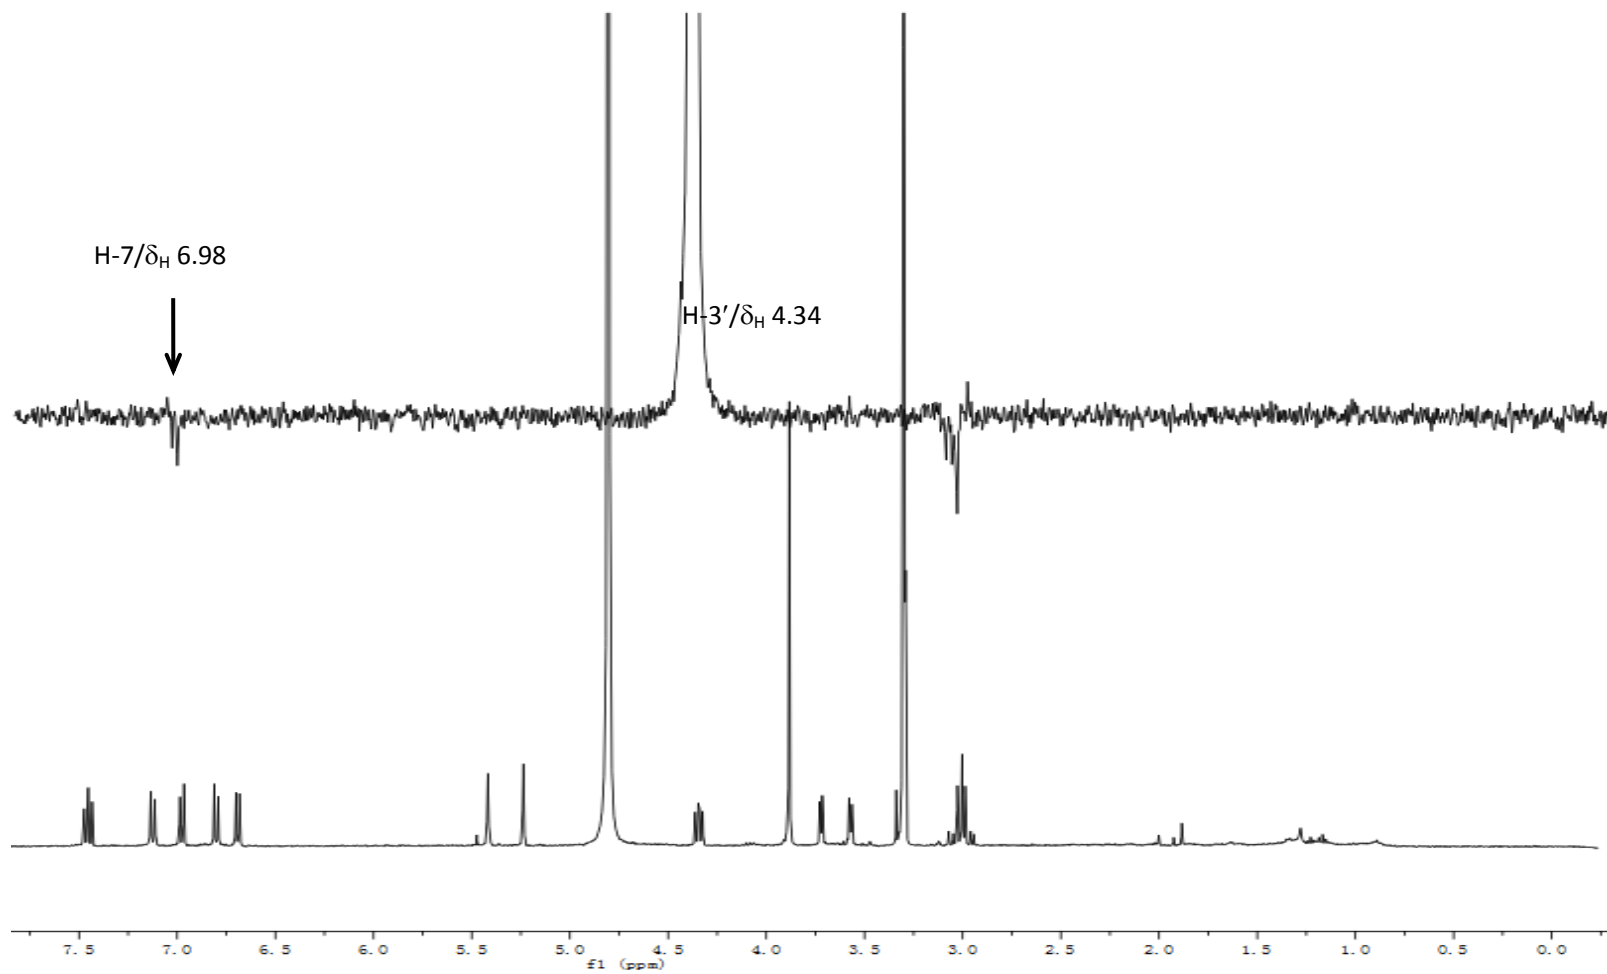

Fig. S23-2 1D sel. Gr. NOE spectrum of the new compound **3**

# Elemental Composition Report

Page 1

## Single Mass Analysis

Tolerance = 5.0 PPM / DBE: min = -1.5, max = 50.0

Element prediction: Off

Number of isotope peaks used for i-FIT = 3

Monoisotopic Mass, Even Electron Ions

1132 formula(e) evaluated with 7 results within limits (up to 50 best isotopic matches for each mass)

Elements Used:

C: 0-500 H: 0-1000 N: 0-200 O: 0-200

16-18-7-2-w2-b-72-3

20111028-12 40 (0.333) Cm (38:42)

1: TOF MS ES+  
5.02e+004

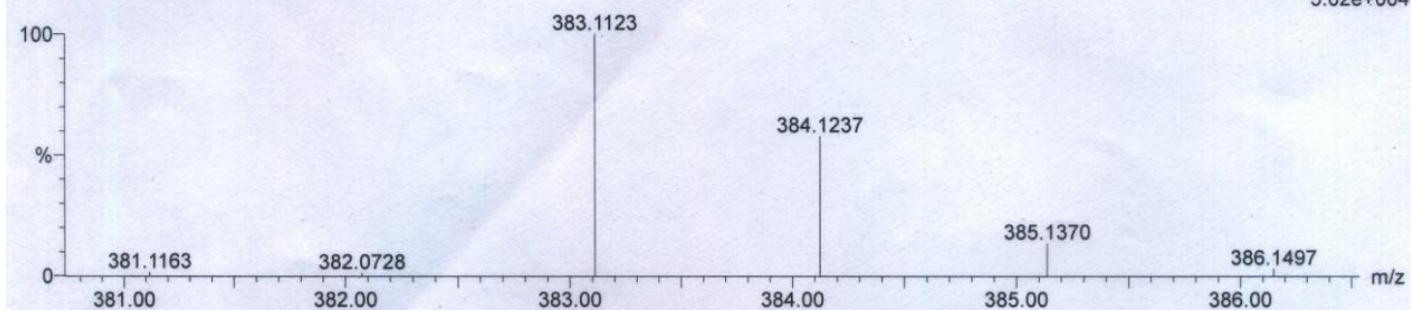

Minimum: -1.5  
Maximum: 5.0 5.0 50.0

| Mass     | Calc. Mass | mDa  | PPM  | DBE  | i-FIT | Norm  | Conf (%) | Formula           |
|----------|------------|------|------|------|-------|-------|----------|-------------------|
| 383.1123 | 383.1131   | -0.8 | -2.1 | 12.5 | 36.9  | 0.978 | 37.62    | <u>C21 H19 O7</u> |
|          | 383.1117   | 0.6  | 1.6  | 18.5 | 37.3  | 1.445 | 23.58    | C18 H11 N10 O     |
|          | 383.1104   | 1.9  | 5.0  | 13.5 | 37.5  | 1.622 | 19.75    | C17 H15 N6 O5     |
|          | 383.1136   | -1.3 | -3.4 | 5.5  | 38.6  | 2.735 | 6.49     | C6 H15 N12 O8     |
|          | 383.1122   | 0.1  | 0.3  | 0.5  | 38.7  | 2.843 | 5.82     | C5 H19 N8 O12     |
|          | 383.1109   | 1.4  | 3.7  | 6.5  | 39.2  | 3.310 | 3.65     | C2 H11 N18 O6     |
|          | 383.1122   | 0.1  | 0.3  | 11.5 | 39.3  | 3.475 | 3.09     | C3 H7 N22 O2      |

Fig. S24 HRESIMS spectrum of the new compound 3

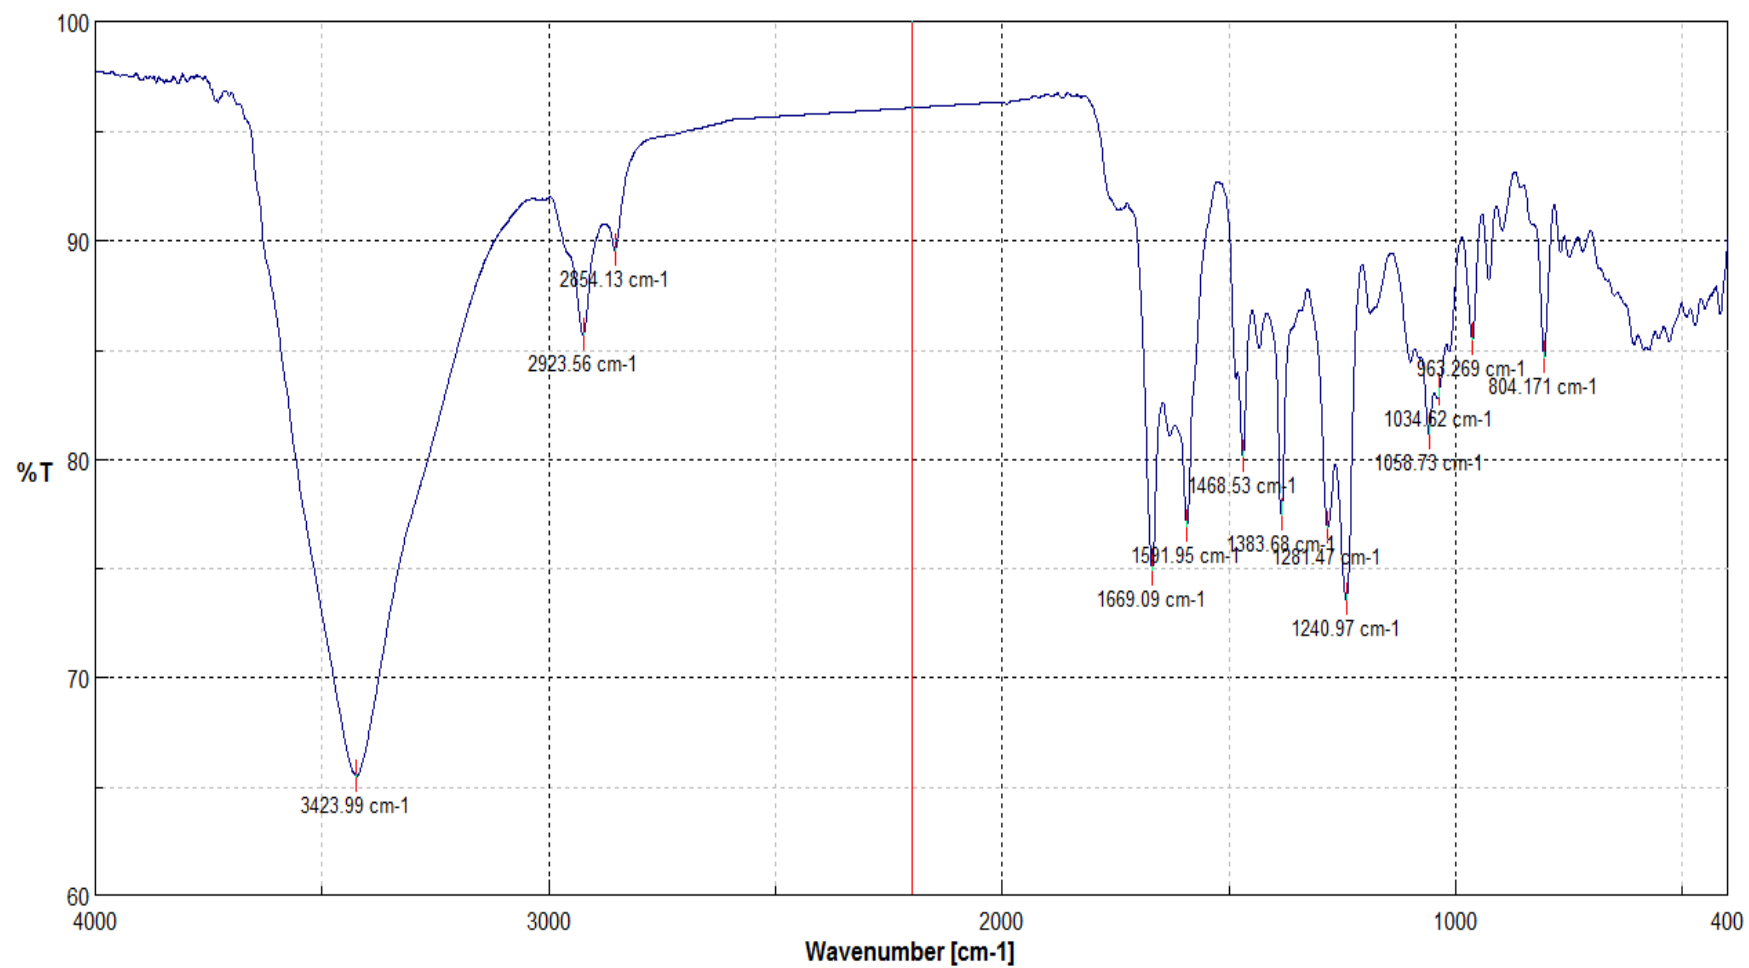

Fig. S25 IR spectrum of the new compound **3**

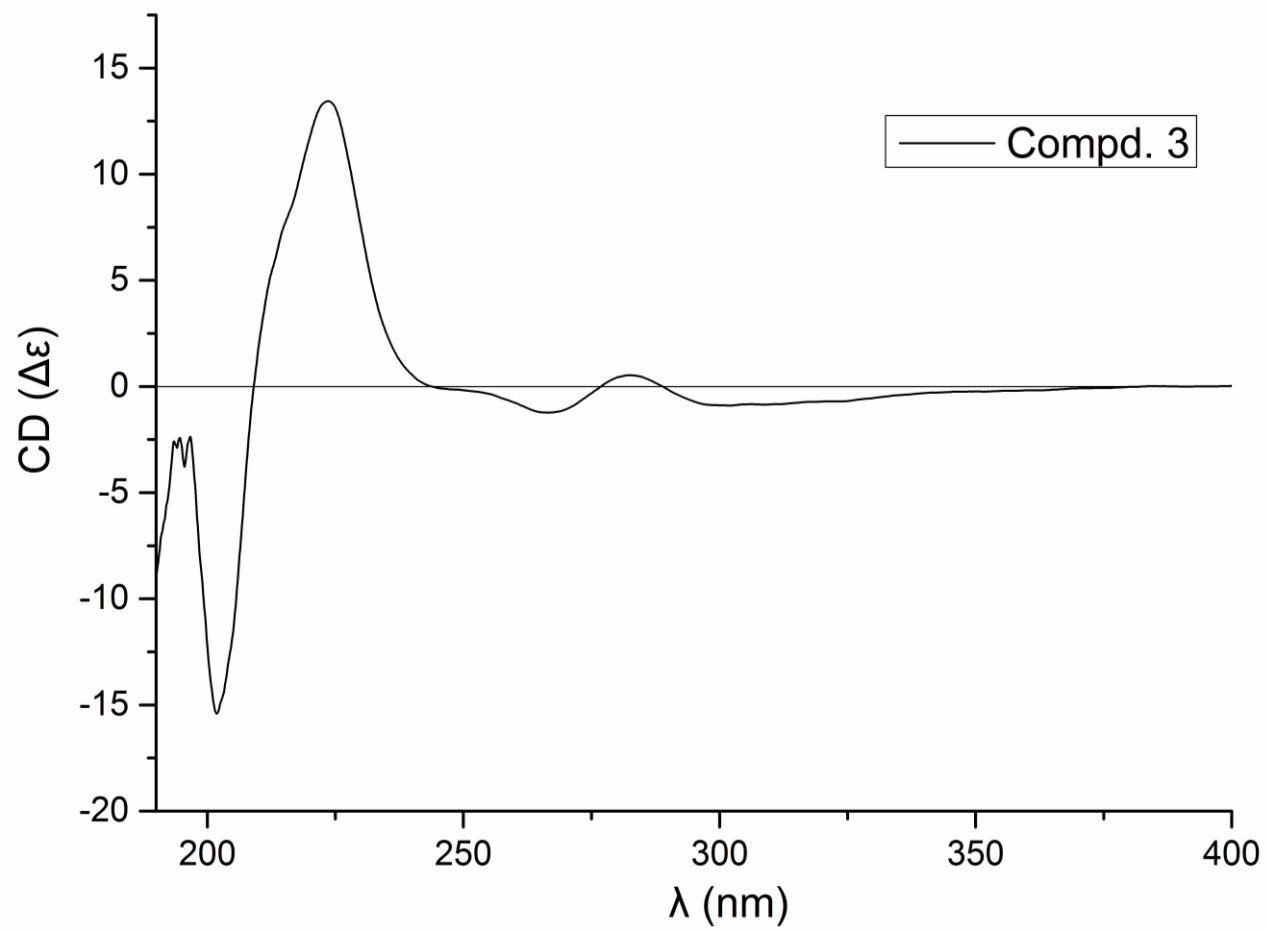

**Fig. S26** CD spectrum of the new compound **3**
